1 **A B73 x Palomero Toluqueño mapping population reveals local adaptation in**  
2 **Mexican highland maize**

3 Sergio Perez-Limón<sup>1,2</sup>, Meng Li<sup>2</sup>, G. Carolina Cintora-Martinez<sup>1,3</sup>, M Rocio Aguilar-Rangel<sup>1,4</sup>,  
4 M. Nancy Salazar-Vidal<sup>1,5</sup>, Eric González-Segovia<sup>1,6</sup>, Karla Blöcher-Juárez<sup>1,7</sup>, Alejandro  
5 Guerrero-Zavala<sup>1</sup>, Benjamin Barrales-Gamez<sup>1</sup>, Jessica Carcaño-Macias<sup>1</sup>, Denise E. Costich<sup>8</sup>,  
6 Jorge Nieto-Sotelo<sup>9</sup>, Octavio Martinez de la Vega<sup>1</sup>, June Simpson<sup>1</sup>, Matthew B. Hufford<sup>10</sup>,  
7 Jeffrey Ross-Ibarra<sup>11</sup>, Sherry Flint-Garcia<sup>5</sup>, Luis Diaz-Garcia<sup>12</sup>, Rubén Rellán-Álvarez<sup>1,13</sup>,  
8 Ruairidh J. H. Sawers<sup>1,2\*</sup>

9 <sup>1</sup> Laboratorio Nacional de Genómica para la Biodiversidad/Unidad de Genómica Avanzada,  
10 Centro de Investigación y de Estudios Avanzados, Instituto Politécnico Nacional (CINVESTAV-  
11 IPN), Irapuato, C.P. 36821, Guanajuato, México.

12 <sup>2</sup> Department of Plant Science, The Pennsylvania State University, State College, PA, USA.

13 <sup>3</sup> present address: Max Planck Institute for Plant Breeding Research, Cologne 50829 Germany.

14 <sup>4</sup> present address: Corteva Agriscience, Tlajomulco de Zúñiga, Jalisco, México, 45560

15 <sup>5</sup> present address: U.S. Department of Agriculture - Agricultural Research Service Plant Genetics  
16 Research Unit, University of Missouri, Columbia, MO, United States

17 <sup>6</sup> Department of Botany, University of British Columbia, Vancouver, British Columbia, Canada.

18 <sup>7</sup> present address: Institute of Molecular Biology (IMB), Mainz 55128, Germany.

19 <sup>8</sup> Institute for Genomic Diversity, Cornell University, Ithaca, NY

20 <sup>9</sup> Jardín Botánico, Instituto de Biología, Universidad Nacional Autónoma de México, Coyoacán,

21 C.P. 04510, Ciudad de México, México.

22 <sup>10</sup> Department of Ecology, Evolution, and Organismal Biology, Iowa State University

23 <sup>11</sup> Department of Evolution and Ecology, Center for Population Biology, and Genome Center,

24 UC Davis

25 <sup>12</sup> Campo Experimental Pabellón-INIFAP. Carretera Aguascalientes-Zacatecas, km. 32.5. 20660.

26 Pabellón de Arteaga, Aguascalientes, México

27 <sup>13</sup> Department of Molecular and Structural Biochemistry, North Carolina State University

28

29 \* Author for correspondence: rjs6686@psu.edu

30

31

32

33 **ABSTRACT**

34 Generations of farmer selection have produced a unique collection of traditional maize varieties  
35 adapted to the environmental challenges of the central Mexican highlands. In addition to  
36 agronomic and cultural value, Mexican highland maize represents a good system for the study of  
37 local adaptation and acquisition of adaptive phenotypes under cultivation. In this study, we  
38 characterized a recombinant inbred line population derived from the cross of the B73 reference  
39 line and the Mexican highland maize variety Palomero Toluqueño. Evaluation over multiple  
40 years in lowland and highland field sites in Mexico identified genomic regions linked to yield  
41 components and putatively adaptive morphological traits. A region on chromosome 7 associated  
42 with ear weight showed antagonistic allelic effects in lowland and highland fields, suggesting a  
43 trade-off consistent with local adaptation. We identified several alleles of highland origin  
44 associated with characteristic highland traits, including reduced tassel branching, increased stem  
45 pigmentation and the presence of stem macrohairs. The oligogenic architecture of characteristic  
46 morphological traits supports their role in adaptation, suggesting they have arisen from  
47 consistent directional selection acting at distinct points across the genome. We discuss these  
48 results in the context of the origin of phenotypic novelty during selection, commenting on the  
49 role of *de novo* mutation and the acquisition of adaptive variation by gene flow from endemic  
50 wild relatives.

## 51 INTRODUCTION

52 Climatic trends and a need to reduce the level of agronomic inputs have fostered interest in the  
53 development of crop varieties that are not only high yielding but *resilient* - *i.e.* their performance  
54 is stable in the face of diverse, and potentially unpredictable, environmental challenges. One  
55 approach to enhance the cultivated genepool for greater resilience is to explore diversity at the  
56 extremes of a crop's distribution (Emon *et al.*, 2015; Dwivedi *et al.*, 2016; Corrado & Rao, 2017;  
57 Sousaraei *et al.*, 2021). Thousands of years of effort and care by the world's traditional farming  
58 communities have generated a rich diversity of landrace varieties, collectively adapted to a far  
59 broader ecological range than modern breeding material (Bellon *et al.*, 2018). Crop landraces  
60 serve to illustrate the mechanisms whereby plants can adapt to environmental stress as well as  
61 representing a valuable source of adaptive variation in their own right.

62 Strong directional selection imposed by prevailing conditions tends to produce highly  
63 specialized forms that perform well in their home environment, but relatively poorer in other  
64 locations, a process referred to as *local adaptation*. Local adaptation is defined formally as  
65 superior performance of local genotypes in their native environment versus non-local genotypes  
66 (Anderson *et al.*, 2013; Mitchell-Olds *et al.*, 2007; Hall *et al.*, 2010; Anderson *et al.*, 2011).  
67 Concomitantly, the average performance of a locally adapted variety over a range of  
68 environments may be poorer than that of a generalist that maintains a reasonable level of  
69 performance in all environments - *stability* in the context of plant breeding. Experimentally, the  
70 best demonstration of local adaptation is the *reciprocal transplant* experiment, in which varieties  
71 of interest are evaluated in a series of common gardens covering the range of their home  
72 environments. Both local adaptation and stability can be described with reference to *genotype x*  
73 *environment interaction* (GEI), *i.e.* the degree to which the relative performance of a given

74 variety compared with others depends on environmental conditions (Juenger, 2013; Assmann,  
75 2013; Scheiner, 1993; El-Soda *et al.*, 2014).

76 By definition, all varieties will likely suffer reduced performance when challenged by  
77 environmental stress. GEI describes variety-specific deviations from the environmental main  
78 effect: some varieties suffer more than average, while others are better able to mitigate the  
79 impact of the stress. In extreme cases, the relative performance of varieties changes between  
80 environments, a scenario referred to as *rank changing* GEI. While stress is often considered with  
81 respect to a single sub-optimal factor, the same framework applies equally to the complex pattern  
82 of challenges presented by different localities. It can be seen that rank changing GEI underpins  
83 local adaptation, as defined above. With the advent of comparative genomics and greater  
84 understanding of the physiology and cell biology of environmental responses, it has become  
85 feasible to begin to characterize the genetic basis of local adaptation (Lovell *et al.*, 2021). Two  
86 principal modes of gene action have been proposed to drive rank changing GEI, namely  
87 *conditional neutrality* and *antagonistic pleiotropy*. Under conditional neutrality, a given genetic  
88 variant is linked to phenotypic change in some environments but not others. A complementary  
89 suite of conditionally neutral loci would, theoretically, be sufficient to generate rank changing  
90 GEI. Under antagonistic pleiotropy, the sign of the effect of a given variant changes between  
91 environments, *e.g.* a beneficial allele in one environment becomes deleterious in another, with a  
92 behaviour at a single variant that directly mirrors the whole genotype pattern of GEI. In practice,  
93 both behaviors will typically contribute to GEI and, indeed, classification of any given variant  
94 will be specific to the environments under consideration (Fournier-Level *et al.*, 2011). In  
95 addition, distinguishing conditional neutrality from antagonistic pleiotropy may be limited by  
96 statistical power in any given design. To date, studies of local adaptation in wild barley *Hordeum*

97 *spontaneum* (Verhoeven et al., 2004; Verhoeven et al., 2008), the annual grass *Avena barbata*  
98 (Gardner & Latta, 2006; Latta et al., 2007; Latta et al., 2010), the model plant *Arabidopsis*  
99 *thaliana* (Weinig et al., 2003; Fournier-Level et al., 2011) and monkey flower *Mimulus guttatus*  
100 (Hall et al., 2010; Lowry et al., 2009) have predominantly found cases of conditional neutrality.  
101 That said, examples of antagonistic pleiotropy do exist, although mostly limited to plant model  
102 organisms such as *Arabidopsis thaliana* (Scarcelli et al., 2007; Todesco et al., 2010), monkey  
103 flower *Mimulus guttatus* (Hall et al., 2010) and *Boechera stricta* (Anderson et al., 2013). An  
104 important consequence of the genetic architecture of local adaptation is the degree to which the  
105 specialist is constrained by trade-offs that impose an unavoidable cost of poor performance  
106 outside of the home environment. In terms of plant breeding, there are analogous implications  
107 with regard to how extensively a given variety can be used and how robust yields will be in the  
108 face of unpredictable or changing environmental conditions.

109         In addition to their intrinsic value, crop landraces provide an excellent system to study  
110 local adaptation, especially with regard to the rapid change required over the relatively short time  
111 frame of domestication. Landraces are dynamic populations, each with a unique identity shaped  
112 by biotic and abiotic stresses, crop management, seed handling and consumer preferences. As  
113 such, landraces are the product of both direct and indirect farmer selection, natural selection in  
114 the face of the local environment and exchange through traditional seed flow networks (Louette  
115 *et al.*, 1997; Cleveland & Soleri, 2007; Mercer *et al.*, 2008; Mercer & Perales, 2019). Typically,  
116 they are cultivated under low-input conditions and produce a modest but stable yield (Zeven,  
117 1998; Breseghello & Coelho, 2013; Dwivedi *et al.*, 2016). The sustained association of a given  
118 landrace population with a given locality results in local adaptation, in the same way it is seen in  
119 wild populations, demonstrable by reciprocal transplantation (Janzen *et al.*, 2021).

120 Maize (*Zea mays* ssp. *mays*) was domesticated from balsas teosinte (*Zea mays* subsp.  
121 *parviglumis*) (Matsuoka *et al.*, 2002), about 9000 years ago, in the basin of the Balsas River in  
122 Mexico (Piperno *et al.*, 2007). After domestication, maize dispersed and was successfully  
123 established in different environments throughout the Americas and, eventually, across the world.  
124 In Mexico alone, 59 different native landraces of maize have been described, grown from sea  
125 level to 3400 m.a.s.l., in a range of environments, from semi-desert to regions with high  
126 humidity and temperature (CONABIO, 2018). One of the environments colonized by early maize  
127 was the central highlands of Mexico. The central Mexican highlands are characterized by low  
128 atmospheric pressure and temperature, high UV-B radiation, seasonal precipitation, presence of  
129 early frosts and low phosphorus availability due to the volcanic origin of the soil (Bellon *et al.*,  
130 2005; Körner, 2007; Mercer *et al.*, 2008; Espinosa-Calderón *et al.*, 2011; Galván-Tejada *et al.*,  
131 2014). Previous work has highlighted the impact of low temperature on unadapted maize  
132 varieties, which when grown at low temperatures and exposed to high light intensity, suffer  
133 metabolic lesions in chlorophyll synthesis, leading to increased photodamage and chlorophyll  
134 turnover (McWilliam & Naylor, 1967). Interestingly, these cold stress-induced symptoms were  
135 not observed in highland maize. Highland maize varieties have to mature and complete the grain  
136 filling before the first frosts (Alvarado-Beltrán *et al.*, 2019). In warmer lowland conditions,  
137 highland material is precocious, flowering in as little as 40 to 50 days.

138 In the Mexican highlands, farmers have adapted their management practices to improve  
139 their chances of obtaining a successful harvest (CIMMYT & Bjarnason, 1994; Eagles &  
140 Lothrop, 1994). To maximize the length of the growing season, farmers sow early, before the  
141 onset of the annual rains. Traditionally, seeds are deep planted (10 - 25 cm) to benefit from  
142 residual soil humidity and to protect from damage from late frosts. This practice allows varieties

143 that require 160-180 days to reach maturity to be grown in areas with a frost-free season of 90-  
144 120 days. The volcanic soils of the Mexican highlands have low pH, restricting the availability  
145 of phosphate to the plant (Bayuelo-Jiménez *et al.*, 2011). Although displaying enhanced  
146 phosphorus use efficiency (Bayuelo-Jiménez & Ochoa-Cadavid, 2014), Mexican highland  
147 landraces tend to show restricted root growth (CIMMYT & Bjarnason, 1994; Eagles & Lothrop,  
148 1994). To compensate for weak root development and prevent lodging, plants may be hilled  
149 (piling of soil around the base of the plant) up to three times during vegetative growth.

150 Palomero Toluqueño (PT) is a popcorn distributed in the highlands of the Mexican  
151 Central Plateau, notably in the valley of Toluca, at elevations from ~2100 to ~2900 m.a.s.l. (Fig.  
152 1A. (Wellhausen *et al.*, 1951; Ruiz Corral *et al.*, 2008; Perales & Golicher, 2014)). Although  
153 present day cultivation is limited  
154 (<https://www.biodiversidad.gob.mx/diversidad/proyectoMaices>), PT is considered ancestral to  
155 the broader Mexican highland maize group and a progenitor of more productive modern  
156 highland landraces (Reif *et al.*, 2006; Arteaga *et al.*, 2016). PT has a relatively small genome and  
157 was selected as the target of the first landrace maize genome sequencing study (Vega-Arreguín *et*  
158 *al.*, 2009; Vielle-Calzada *et al.*, 2009). Subsequent work has continued to explore gene  
159 expression variation in PT (Aguilar-Rangel *et al.*, 2017; Crow *et al.*, 2020) and characterize  
160 wild-relative introgression through generation of additional genomic sequence (Gonzalez-  
161 Segovia *et al.*, 2019). In contrast, B73 is an elite inbred line developed in 1972 by Iowa State  
162 University as part of the breeding program for the US maize corn belt. It was highly prized for its  
163 ability to form high yielding hybrids and soon became a key ancestral female line in today's  
164 global germplasm pool (Troyer, 1999; Iowa State University, 2009). B73 was selected for the



165 first genome assembly in maize (Schnable *et al.*, 2009) and remains as the primary reference  
166 genome (Jiao *et al.*, 2017).

167         In this work, we characterize a mapping population generated from the cross of B73 and  
168 PT. We demonstrate local adaptation in PT and characterize associated genetic architecture by  
169 reciprocal transplant and two-site evaluation of our mapping population. We identified  
170 Quantitative Trait Loci (QTL) linked to phenology, morphology and yield components,  
171 including evidence to QTL x environment interaction (QEI). Overall, morphological QTL were  
172 stable across environments with either little QEI or mild scaling effects. We observed stronger  
173 QEI associated with yield components, including an example of antagonistic pleiotropy on  
174 chromosome (chr) 7, indicating a single locus fitness trade-off. We found evidence for relatively  
175 complex genetic architectures associated with putatively adaptive morphological traits. We  
176 discuss the implications of these results with respect to the origin of adaptive variation during  
177 rapid local adaptation in cultivated species.

178

## 179 **MATERIALS AND METHODS**

### 180 *Plant material*

181 To generate the biparental mapping population, an F<sub>1</sub> was generated from the cross between the  
182 reference inbred line B73 and pollen pooled from several individuals of Palomero Toluqueño  
183 (PT), an open pollinated landrace endemic of the Mexican highlands. The accession used was  
184 MEXI5 (CIMMYTMA-002233) obtained from the International Center for Maize and Wheat  
185 Improvement (CIMMYT) seed bank, originally collected near the city of Toluca, Mexico State  
186 (19.286184N, -99.570871W) at 2597 m.a.s.l. A single B73xPT F<sub>1</sub> individual was crossed as  
187 male to multiple B73 ears to generate a large BC<sub>1</sub> population, capturing a single haplotype of PT.

188 The BC<sub>1</sub> was then self-pollinated 5 generations to form a BC<sub>1</sub>S<sub>5</sub> RIL population, with an average  
189 of 25% of their genome from PT, and 75% of B73. 120 different families were advanced as  
190 independent pedigrees from BC<sub>1</sub>S<sub>1</sub> to BC<sub>1</sub>S<sub>5</sub>. The same initial crossing strategy was used to  
191 generate material from the cross between B73 and the open-pollinated Conico/Celaya accession  
192 Michoacán 21 (Mi21; CIMMYTMA-001872). B73xMi21 stocks were further backcrossed to  
193 B73 with phenotypic selection for sheath pubescence and a segregating BC<sub>5</sub>S<sub>1</sub> stock produced.  
194 The progenitor B73xPT and B73xMi21 F<sub>1</sub> individuals described here are the same as those used  
195 in a previous report to derive introgression stocks segregating the *Inv4m* inversion polymorphism  
196 (Crow *et al.*, 2020).

197

#### 198 *DNA preparation and genotyping*

199 DNA was extracted from 100 B73xPT Recombinant Inbred Lines and four different B73 and PT  
200 individuals using isopropanol extraction. 50 mg of leaf tissue were harvested for each plant in a  
201 2.0 mL tube and then frozen to -80 C. The frozen tissue was ground in a Qiagen TissueLyser II  
202 (Cat. ID: 85300) with a 30 Hz frequency for 30 s. After grinding, 300 µL of UEB1 (250 mM  
203 NaCl, 200 mM Tris pH 7.5, 25 mM EDTA, 0.5%SDS) buffer were added and the solution was  
204 mixed in a Thermomixer at 38 C for 10 minutes. 2µL of PureLink RNase were added and the  
205 mix was left incubating for 30 min. After incubation, samples were separated by centrifugation at  
206 14,000 rpm for 10 min at room temperature. 250 µL of supernatant was recovered and collected  
207 in a 1.5 mL tube. 40 µL of 3 M sodium acetate, pH 5.2 and 450 µL of isopropanol were added  
208 per tube, and samples incubated for 20 min at 4 C. A further centrifugation step was performed  
209 (14000 rpm, 10 min, room temperature) and the supernatant was discarded. Pellets were washed  
210 twice with 250 µL of 70% ethanol. The supernatant was discarded, and the pellet was left to dry

211 for 30 min. When the pellet was dry, it was resuspended in 100  $\mu$ L of milliQ water. DNA was  
212 quantified by spectroscopy and adjusted to a concentration of 20 ng/ $\mu$ L. DNA was genotyped at  
213 the SAGA (Servicio de Análisis Genético para la Agricultura,  
214 <https://seedsofdiscovery.org/about/genotyping-platform/>) laboratory in CIMMyT by DArTSeq  
215 (Edet *et al.*, 2018) , generating ~ 30,000 short length reads per sample.

216

### 217 *Processing of short read genotyping data and construction of the genetic map*

218 Short read DNA sequences generated DArT-Seq were aligned to the v4 B73 reference genome  
219 (Jiao *et al.*, 2017) using seqmap (Jiang & Wong, 2008). Sequences that aligned to more than one  
220 physical position in the reference genome or that did not align were discarded. Genotype and  
221 SNP calling were performed with TASSEL 5 (Bradbury *et al.*, 2007). SNP calls were  
222 transformed to an ABH format, A assigned to B73 and B to PT. Sites for which the parental  
223 genotype was missing, ambiguous or heterozygous were removed. SNP calls were processed  
224 using Genotype-Corrector (Miao *et al.*, 2018), which considerably increased the contiguity of  
225 haplotypes among chromosomes. A set of 2, 067 polymorphic markers were selected for further  
226 analysis. The ABH genotype file was visualized using R/ABHgenotypeR (Reuscher & Furuta,  
227 2016). Linked markers with shared patterns of segregation were identified with findDupMarkers  
228 function of R/qtl package (Broman *et al.*, 2003). Removing redundant makers reduced the final  
229 set to 918 polymorphic markers. The linkage map was built using the R/ASmap::mstmap (Taylor  
230 & Butler, 2017) under the Kosambi map function. Five individuals from a B73xMi21 BC<sub>5</sub>S<sub>1</sub>  
231 family segregating sheath pubescence were genotyped using the same DArT-Seq platform as part  
232 of a project described in (Gonzalez-Segovia *et al.*, 2019).

233

234 *Field Evaluation*

235 The BC<sub>1</sub>S<sub>5</sub> population was evaluated in the highlands during 2015, 2016, 2018 and 2019 at 2610  
236 m.a.s.l. in Metepec (MT; Mean average temperature: 12.4 °C; mean annual precipitation: 809 mm;  
237 Andosolic soil), Mexico State, and in the lowlands during 2015 and 2016 at 54 m.a.s.l. in Valle de  
238 Banderas (VB. Mean average temperature: 25.8 °C; mean annual precipitation: 1173 mm;  
239 Regosolic soil), Nayarit (Table S1; Fig. S6). BC<sub>1</sub>S<sub>5</sub> families were evaluated in single-row 15 plant  
240 plots with 15 plants in 3 randomized complete blocks in MT and two blocks in VB. B73 and PT  
241 parents were inserted randomly in each block during 2015 and 2016. Weeds and insects were  
242 controlled by chemical methods as needed. The VB field site was provided with a ferti-irrigation.  
243 System. The MT field site was rain-fed with supplemental sprinkler irrigation after planting and  
244 when needed.

245

246 *Data preparation and trait estimation*

247 Preparation of trait data and QTL mapping was performed in R Statistics (Robinson *et al.*, 2010;  
248 McCarthy *et al.*, 2012; R Core Team, 2019). Data collected from single row plots were collapsed  
249 to a single value per plot: plot medians were taken for traits scored on multiple individuals; plot  
250 level traits such as stand count or flowering time were unchanged. Data was trimmed to remove  
251 outliers per trait/location (VB or MT) using R/graphics::boxplot default criteria. Continuous  
252 traits (ASI, DTA, DTS, ED, EH, EL, EW, PH, TKN, TKW, and TL) were further adjusted on a  
253 per block basis to a spline fitted using R/stats::smooth.spline against row number to reduce  
254 spatial variation at the sub-block scale. Spline fitting was not applied to any block containing less  
255 than 50 plots. The final dataset contained 4 years of data for location MT (123 genotypes from  
256 one block in 2015, 105 genotypes from three blocks in 2016, 140 genotypes from two blocks in

257 2018, and 110 genotypes from one block in 2019), and two years of data for location VB (123  
258 genotypes from one block in 2015, and 117 genotypes from two blocks in 2016). For each  
259 continuous phenotypic trait, a mixed linear model was fitted using restricted maximum-  
260 likelihood with R/lme4::lmer. To fit the model, a location-year variable was generated to  
261 represent the location by year combinations, and a location-year-block variable was generated to  
262 represent all location, year, and block combinations, such that:

$$263 \quad y_{ijklm} = \mu + E_i + G_j + GE_{ij} + Y_k + B_m + \varepsilon_{ijklm}$$

264 where the response variable  $y_{ijklm}$  is a function of the overall mean ( $\mu$ ), fixed effect of location  
265 ( $E_i$ ), random effect of genotype ( $G_j$ ), genotype by location interaction ( $GE_{ij}$ ), location-year  
266 term ( $Y_k$ ), location-year-block term ( $B_m$ ), and the residual. BLUP values for the genotypic effect  
267 (G) and genotype by location interactions (GEI) were extracted using R/lme4::ranef. We  
268 calculated BLUP values for each genotype and location combination (G+GEI) by adding  
269 genotypic BLUPs and GEI BLUPs (Olivoto *et al.*, 2019). We also calculated fitted values by  
270 adding BLUPs to the appropriate means for data visualization and downstream analyses using  
271 natural units: for genotypic effect, fitted values were calculated by adding genotypic BLUPs to  
272 the grand mean; fitted values for each genotype and location combination were calculated by  
273 adding G+GEI BLUPs to the location mean. The significance of the environment effect was  
274 evaluated by comparing the full model with location effect and the reduced model without  
275 location effect using the likelihood ratio test for continuous phenotypic traits (Table 1). For  
276 phenotypic traits with count and scale data, two-group Wilcoxon tests were conducted to  
277 evaluate the difference between the two locations (Table 1).

278

279 *QTL mapping*

280 The BLUPs for continuous traits, the medians for count traits and the mode for semi-quantitative  
281 scale traits were used as phenotypic inputs for QTL mapping. Phenotypic scores were  
282 selected/combined to perform four distinct analyses: 1) GEN: the genotype main effect (G) of the  
283 mixed linear model for continuous traits and the median/mode across all plots for other traits; 2)  
284 VB: G+GxE term for VB for continuous traits and the VB median/mode for other traits; 3) MT:  
285 G+GxE term for MT for continuous traits and the MT median/mode for other traits; 4) GEI: the  
286 difference between MT and VB GxE BLUPs for continuous traits and the difference between MT  
287 and VB median/mode for other traits.

288 Individual QTLs were detected using single QTL scan and Multiple QTL Mapping (MQM)  
289 with `R/qtl::scanone` (default options; Haley-Knott regression. Broman *et al.*, 2003) and  
290 `R/qtl::MQM` (default options. 100 autocofactors, `step.size = 1`, `window.size = 25`. Arends *et al.*,  
291 2010), respectively. Genome-wide LOD significance thresholds were established at  $\alpha = 0.05$  by  
292 1000 permutations of scanone and MQM and scanone models. Individually QTL were combined  
293 in an additive multi-QTL model with `R/qtl::makeqtl` and their positions refined with  
294 `R/qtl::refineqtl`. The function `R/qtl::addqtl` was used to detect additional QTLs in a multi-QTL  
295 context with a LOD threshold of 3 LOD considered significant. The final multi-QTL model was  
296 applied using `R/qtl::fitqtl` (Haley-Knott regression) to obtain the refined position and variance  
297 explained. Significance levels of the full model and the component QTL terms were obtained from  
298 the drop-one ANOVA table. Bayes confidence intervals were obtained from the `fitqtl` model. The  
299 effect size and effect plots of each individual term of the full model were obtained with  
300 `R/qtl::effectplot`.

301

302 *Elevation eGWAS*

303 We performed an environmental genome-wide association analysis (eGWAS) to measure the  
304 association between genetic loci and the elevation of native environment for landrace accessions  
305 across Mexico, as previously described (Gates *et al.*, 2019). The data set consisted of 1, 830  
306 Mexican maize landrace accessions from the CIMMyT Maize Germplasm Bank with elevation  
307 data, genotyped for 440, 000 single nucleotide polymorphisms (SNPs; Romero Navarro *et al.*,  
308 2017; Gates *et al.*, 2019). We used a linear model to fit the genotypic data and elevation to the  
309 landrace data. The first five eigenvectors of the genetic relationship matrix were included in the  
310 linear model to control for the population structure. The top 1000 SNPs with the strongest  
311 association with elevation were selected and used in the downstream analysis.

312

#### 313 *Data availability statement*

314 PT (CIMMYTMA-002233) and Mi21 (CIMMYTMA-001872) accessions are available directly  
315 from CIMMyT ([www.cimmyt.org](http://www.cimmyt.org)). All other materials are available on request subject to costs  
316 of propagation and export if outside of Mexico. Derived material is covered by the same  
317 CIMMyT MTA as the progenitor parents. Supplemental files available at  
318 <https://doi.org/10.6084/m9.figshare.16608517.v1>. *Phenotypic data*: BLUPs and fitted values  
319 estimated for diverse traits for 97 B73xPT BC<sub>1</sub>S<sub>5</sub> families. *Genetic map*: genetic map of the  
320 B73xPT BC<sub>1</sub>S<sub>5</sub> mapping population. *Altitude eGWAS*: results contains the results of the eGWAS  
321 analysis. *QTL LOD profile*: LOD profile of the multi-QTL models for different traits for each set  
322 of phenotypic data. *Effect Plots*: estimated effect of the QTLs detected for a set of phenotypic  
323 data using fitted values. *Reaction norms*: contains the reaction norms estimated for all the QTLs  
324 detected in VB and MT phenotypic sets using fitted values.

325

## 326 **RESULTS**

### 327 **The stress of the highland environment limits maize growth and productivity**

328 To characterize the genetic architecture of highland adaptation in Mexican native maize (Fig.  
329 1A), we crossed the highland landrace Palomero Toluqueño (PT) to the US reference inbred line  
330 B73 and derived 120 BC<sub>1</sub>S<sub>5</sub> families. When generating the BC<sub>1</sub>, we used a single F<sub>1</sub> individual as  
331 a male to pollinate several B73 females, ensuring that a single PT haplotype was captured from  
332 the open-pollinated donor accession. As a consequence our mapping population was bi-allelic,  
333 *i.e.* segregating for B73 and a single PT allele at any given locus. The final BC<sub>1</sub>S<sub>5</sub> families  
334 carried ~25% PT genome in a B73 background, with homozygosity > 98%. BC<sub>1</sub>S<sub>5</sub> families were  
335 genotyped using the DArT Seq platform (<http://www.diversityarrays.com/>) and a final set of 918  
336 markers were selected and used to generate a linkage map for quantitative trait locus (QTL)  
337 mapping.

338 We evaluated the 120 B73 x PT BC<sub>1</sub>S<sub>5</sub> families and parents in Mexican lowland (Valle  
339 de Banderas, Nayarit at 54 m.a.s.l.) and highland (Metepc, Mexico State, at 2610 m.a.s.l.) field  
340 sites. Lowland trials were conducted during the dry season from November to March with  
341 supplemental irrigation. Highland trials were conducted in a rain-fed field in the standard  
342 highland cycle from April to November. We collected data on a range of phenological,  
343 morphological and agronomic traits (Table 1). B73 and PT parents showed a classic pattern of  
344 rank-changing GEI for yield components across the two locations, demonstrating adaptation of  
345 PT to the highland environment (Fig. 1B, 1-S5). The negative impact of the highland  
346 environment on B73 was dramatic, while PT was more stable across the two sites. Across all of  
347 the BC<sub>1</sub>S<sub>5</sub> genotypes, there was a significant environmental effect on 9 of 19 traits (Fig. 1C; 1-  
348 S1; Table 1). Average flowering (days to anthesis, DTA and days to silking, DTS), measured in



349 chronological days, was greatly delayed in the highland site by 71 days. Overall, plants in the  
350 highlands were shorter in stature (plant height, PH) and produced smaller ears (ear diameter, ED;  
351 ear height, EH; ear weight, EW) bearing fewer grains (total kernel number, TKN) (Fig. 1C).  
352 Average total kernel weight per plant (TKW) dropped from 36.5 g to 15.3 g, a reduction of 58 %,  
353 from the lowland to highland field (Fig.1 C).

354

### 355 **Segregation in the BC<sub>1</sub>S<sub>5</sub> reflects GEI seen in the B73 and PT parents**

356 Having characterized the main effect of the highland environment, we explored GEI among the  
357 BC<sub>1</sub>S<sub>5</sub> families. For certain traits, such as EH, there was a clear environmental effect (Fig. 2A),  
358 but little evidence of GEI between the parents nor among the lines (Fig. 2B). In contrast, yield  
359 components such as EW and TKW showed a strong environmental effect (Fig. 1C), GEI between  
360 parents, and extensive rank-changing GEI among BC<sub>1</sub>S<sub>5</sub> families (Fig. 2C, D; Fig. 2-S1). Taking  
361 EW as a proxy for yield, many BC<sub>1</sub>S<sub>5</sub> families were more stable with respect to location than the  
362 two parents, although the majority were inferior to the better parent in either site. That said, we  
363 did observe a small number of families that performed as well as, or better, than the parents in  
364 both locations.

365

### 366 **QEI associated with yield components indicates local adaptation at the locus level**

367 Extensive GEI for yield components could be associated with either conditional effects or  
368 antagonistic pleiotropic at individual QTL (Fig. 3A). To explore the genetic architecture  
369 underlying GEI for yield components in our BC<sub>1</sub>S<sub>5</sub> families, we performed a QTL analysis, using  
370 a series of trait combinations to allow us to determine QTL effects in the lowland and highland  
371 sites, as well as to identify QEI. Across the four phenotypic sets, we identified 44 different QTLs

372 where eighteen were significant under the GxE analysis, mirroring the GEI observed at the level  
373 of individual lines (Table 2).

374 We identified a total of 14 QTL for the yield components: ear length (qEL3, qEL4, qEL7,  
375 and qEL8), ear diameter (qED4, qED5, and qED8), kernel row number (qKRN1 and qKRN8),  
376 kernels per row (qKPR8), ear weight (qEW7 and qEW8), and total kernel number (qTKN7,  
377 qTKN8, and qTKN9) (Fig. 3C, Table 2). QTL for the primary yield component EW on  
378 chromosomes (chr) 7 and 8 showed the B73 alleles to be associated with higher EW in the  
379 lowlands, and the PT alleles associated with higher EW in the highlands (Fig. 3C). Statistical  
380 support for GEI was detected at EW7 but not EW8. There was some support for antagonistic  
381 pleiotropy at EW7, although evidence was strongest for a highland conditional effect (Fig. 3D, E,  
382 F).

383

#### 384 **PT alleles at major flowering time QTL on chromosome 8 and 6 accelerate flowering**

385 We detected 13 unique QTLs for flowering time traits (DTA, DTS, ASI) some of which were  
386 detected across all analyses (*e.g.* qDTA8b, detected in GEN, VB, MT and GEI sets). Clusters of  
387 flowering QTL were found on both chromosomes 8 and 6 (Table 2). qDTA8b, qDTS8 and  
388 qASI8 were consistently detected across the GEN, MT, VB and GEI sets, and qDTA6, qDTS6  
389 were detected in the GEN, MT and GEI sets. Mirroring the parental difference, the PT allele at  
390 qDTA8b, qDTS8, qDTA6 and qDTS6 accelerates flowering. Flowering QTL have been  
391 consistently detected on Chr 8 in maize-teosinte mapping populations and maize diversity panels  
392 in the context of differences between temperate and tropical material (Jiang *et al.*, 1999; Chardon  
393 *et al.*, 2004; Buckler *et al.*, 2009; Coles *et al.*, 2010; Bouchet *et al.*, 2013; Xu *et al.*, 2017; Guo *et*  
394 *al.*, 2018). The QTLs on chromosome 8 are in the vicinity of the well-characterized flowering

395 loci *vgt1* and *ZEA CENTRORADIALIS 8 (Zcn8)*. The locus *vgt1* corresponds to a non-coding  
396 region of ~ 2 kb that regulates *ZmRap2.7*, an *APETALA-2* like gene located ~ 70 kb downstream  
397 (Salvi *et al.*, 2007); *Zcn8* is the florigen gene of maize and has a central role in mediating  
398 flowering (Meng *et al.*, 2011; Guo *et al.*, 2018). Polymorphisms in *vgt1* and *Zcn8* have  
399 previously been associated with flowering time variation associated with both adaptation to  
400 latitude and altitude (Salvi *et al.*, 2007; Ducrocq *et al.*, 2008; Buckler *et al.*, 2009; Romero  
401 Navarro *et al.*, 2017; Guo *et al.*, 2018). Given their close proximity, it was not possible to  
402 confidently separate the potential effects of *vgt8* and *Zcn8* in our population, and we consider it  
403 possible that the combined effect of variation in these two loci underlies our Chr 8 QTL.

404         The QTL qDTA6 and qDTS6 are in close proximity to the gene *Peamt2*  
405 (*Zm00001eb294690*, chromosome 6 ~ 166.5 MB), an ortholog of the *Arabidopsis XIPOTLI*  
406 gene which encodes a phosphoethanolamine N-methyltransferase (PEAMT). PEAMT catalyzes  
407 the transformation of phosphocholine to phosphatidylcholine (PC), (Cruz-Ramírez *et al.*, 2004;  
408 Sánchez Martínez, 2018). The balance between PC and its precursors has been associated with  
409 the timing of flowering in *Arabidopsis* (Nakamura *et al.*, 2014) and previously implicated in  
410 early flowering in Mexican highland maize (Rodríguez-Zapata *et al.*, 2021). Nevertheless, fine  
411 mapping and metabolic studies would be needed to confirm the possible role of variation of  
412 *Peamt2* in flowering time variation

413

#### 414 **Identification of QTL linked to characteristic tassel and stem traits**

415 PT displays a number of putatively adaptive morphological traits that are characteristic of the  
416 Mexican highland group as a whole (Fig. 1A, Eagles & Lothrop, 1994; Gonzalez-Segovia *et al.*,  
417 2019). To gain insight into the targets and mechanism of selection during local adaptation, we

418 collected data on tassel (male inflorescence) morphology, stem pigmentation and stem  
419 pubescence from our BC<sub>1</sub>S<sub>5</sub> families (Table 1).

420 The PT tassel is large but unbranched with respect to B73 or typical Mexican lowland  
421 landraces (Fig. 4A, B). Across the BC<sub>1</sub>S<sub>5</sub> population, tassel length (TL) and tassel branch  
422 number (TBN) showed a mild reduction in the highlands compared with the lowland  
423 environment, with little GEI between parents or among families (Fig. 4C-F). We identified two  
424 QTL linked to TL (qTL1 and qTL2) and two linked to TBN (qTBN2 and qTBN7; Table 2). In  
425 common with observations at the whole genotype level, QTL effects for tassel traits were  
426 constant in the two environments, and there was no indication of QEI (Perez-Limon et al. 2021,  
427 QTL reaction norms). For qTL1, the effect was not aligned with the parental difference, with  
428 the PT allele being linked to shorter TL. For TBN, the PT allele at qTBN7 was linked to less  
429 branching, while the PT allele at qTBN2 was linked to greater branching (Figure 4H). The  
430 largest TBN effect was associated with qTBN7 that co-localized with a previously reported TBN  
431 QTL (Xu *et al.*, 2017; Gonzalez-Segovia *et al.*, 2019) and the *Ramosa1* (*Ra1*, Zm00001d020430,  
432 chromosome 7 at 113.57 MB) candidate gene (Sigmon & Vollbrecht, 2010; Fig. 3G, H).

433 PT displays strong stem pigmentation in comparison to the non-pigmented stem of B73  
434 (Fig. 1A, 5A). We detected two QTL for pigment intensity (qINT2 and qINT10) with no  
435 evidence of QEI (Perez-Limon et al. 2021, QTL reaction norms; Table 2). The qINT2 interval  
436 colocalizes with a QTL previously reported in a Palomero Toluqueño x Reventador F<sub>2</sub> mapping  
437 population (Gonzalez-Segovia *et al.*, 2019). Pigment QTL were linked to the well-characterized  
438 basic helix-loop-helix (bHLH) regulators of anthocyanin biosynthesis *b1* (Zm00001d000236 chr  
439 2, 198.2 MB) and *r1* (Zm00001d026147, chr10 139.78 MB. Dooner & Kermicle, 1976;  
440 Radicella *et al.*, 1992; Selinger *et al.*, 1998; Selinger & Chandler, 1999, 2001; Chatham & Juvik,

441 2021). It has been demonstrated that functional variation at *b1* is driven by varying patterns of  
442 upstream transposon insertion, leading to differences in pigmentation patterns. For example, *B-*  
443 *Bolivia* induces the biosynthesis of anthocyanin in both vegetative tissue and the aleurone of the  
444 grain, while the *B-Mex7* allele, which was identified from the Mexican highland landrace  
445 Cacahuazintle, induces pigment in the sheath margins of the sheath (Chandler *et al.*, 1989;  
446 Radicella *et al.*, 1992; Selinger & Chandler, 1999).

447 PT, in common with other Mexican highland landraces, exhibits pronounced stem  
448 pubescence (Fig. 5A). Although stem macrohairs were present in the BC<sub>1</sub>S<sub>5</sub> families, no single  
449 family reached the level of pubescence seen in the PT parent, suggesting a complex genetic  
450 architecture. Furthermore, the reduced vigor of the BC<sub>1</sub>S<sub>5</sub> families in the highland location was  
451 associated with poor expression of the pubescence trait and difficulty in scoring. Using a semi-  
452 quantitative scale for evaluation, we identified four QTL linked to stem macrohairs, located on  
453 chromosomes 3, 7, 8, and 9 (Fig. 5). The QTL interval qMH9 included the *macrohairless1*  
454 (*mh11*, bin 9.04) locus that has previously been linked to the production of leaf blade macrohairs  
455 in temperate inbred maize (Moose *et al.*, 2004). The qMH9 region also coincided with a  
456 previously reported region of introgression from the highland teosinte *Zea mays ssp. mexicana*  
457 (itself typically pubescent) to Mexican highland maize (Hufford *et al.*, 2013; Gonzalez-Segovia  
458 *et al.*, 2019; Calfee *et al.*, 2021). This region has been characterized as a chromosomal inversion  
459 of ~3 MB that displays patterns of selection in highland maize populations (Calfee *et al.*, 2021).  
460 The qMH9 interval was relatively large (~12 cM, estimated to cover ~100 Mb) and inspection of  
461 the LOD profile suggested the possible presence of two peaks (Fig. 5B). Although presented here  
462 as a single QTL, there may in fact be two linked factors.

463 For all macrohair QTL, the PT allele was associated with greater stem pubescence. We  
464 previously reported difficulty in mapping sheath macrohairs in a PT x lowland landrace F<sub>2</sub>  
465 population because nearly all plants were scored as pubescent in a simple qualitative evaluation  
466 (Gonzalez-Segovia *et al.*, 2019). We interpreted this previous observation to indicate the action  
467 of several partially dominant factors, each individually sufficient to trigger the production of  
468 stem macrohairs. To further test this hypothesis, we extracted the effect of the PT allele at each  
469 macrohair QTL in turn, fixing the other loci as B73 (Fig. 5C). Consistent with genetic  
470 redundancy, the PT allele at any macrohair QTL was sufficient to promote a degree of stem  
471 pubescence ( $p < 0.01$  for all three QTL compared to families carrying B73 alleles at all qMH  
472 loci). Although limited by the size of our population and the qualitative nature of our  
473 phenotyping, we could detect a significant difference between families carrying PT alleles at  
474 several macrohair loci and those carrying the PT allele at only one of the loci ( $p = 0.26$ ; Fig. 5D).  
475 Unfortunately, no family carried PT alleles at all four of the loci (this is not unexpected in a BC<sub>1</sub>  
476 population of 120 families). Although the four macrohair loci were individually sufficient to  
477 induce stem macrohair production, we hypothesise that their combined effect (and potentially  
478 that of additional loci) is necessary to approach the levels of pubescence of the PT parent.

479 In parallel with generation of the BC<sub>1</sub>S<sub>5</sub> population, we also produced pubescent near  
480 isogenic lines (NILs) by phenotypic selection and recurrent backcrossing to B73. Here, we  
481 initially used several different Mexican highland landrace donors. Material generated from the  
482 PT relative Conico (accession Michoacan 21) consistently showed the greatest pubescence and  
483 was prioritized for backcrossing and genotypic analysis. A BC<sub>5</sub>S<sub>1</sub> family showed 3:1 segregation  
484 of pubescent to glabrous plants, indicating the action of a single, dominant locus (we did not  
485 attempt to distinguish degrees of pubescence in this evaluation, and we do not exclude partial

486 dominance or an additive effect). We selected two strongly pubescent and three strongly  
487 glabrous individuals for genotyping using the DArT-Seq platform. The pubescent individuals  
488 carried a large block of Mi21 introgression across chr 3 that was absent from glabrous plants  
489 (Fig. 3-S1). Introgression carried in the pubescent NIL spanned the qMHP3 interval identified in  
490 the B73xPT population, providing an independent line of evidence for a QTL in this location.  
491 There was no evidence of significant Mi21 introgression on chr 7, 8 or 9 in these BC<sub>5</sub>S<sub>1</sub>  
492 individuals, supporting our previous conclusion that macrohair QTL are individually sufficient  
493 to promote a degree of stem macrohair production. The BC<sub>5</sub>S<sub>1</sub> family provides a good starting  
494 point towards fine mapping and cloning of qMHP3.

495

#### 496 **Comparison of B73xPT QTL and broader landrace diversity**

497 To compare QTL detected in our B73xPT BC<sub>1</sub>S<sub>5</sub> population to the broader diversity present in  
498 Mexican highland maize, we performed an environmental-genome wide association study  
499 (eGWAS) using a previously genotyped panel of 1830 geo-referenced Mexican landrace  
500 accessions (Romero Navarro *et al.*, 2017; Gates *et al.*, 2019; Fig. 6A; 4-S1). We selected the top  
501 1000 SNPs most significantly associated with elevation and compared their physical location  
502 with the location of our QTL. The strongest environmental association was detected on  
503 chromosome 4 at the previously reported inversion polymorphism *Inv4m* (Romero Navarro *et*  
504 *al.*, 2017; Crow *et al.*, 2020). Although qED4, detected in our QTL mapping, co-localized with  
505 this region on chromosome 4 (Fig. 6B), we found no signal linking *Inv4m* to additional yield  
506 components or evidence of a previously reported flowering time effect in our QTL analysis.  
507 Further high confidence SNPs were found on chromosomes 2, 3, 5, 7, 8 and 10 (Fig. S4). A high  
508 confidence SNP on chr 7 (7\_17794242) was identified adjacent to the GEI peak associated with

509 qEW7 (Fig. 6C). This region was also identified in a previous experiment to map yield and  
510 harvest index QTL in a comparison of lowland and highland Mexican maize (Jiang *et al.*, 1999).  
511 In other cases, for example qTKW8 (Fig. 6D), there was no strong correspondence between the  
512 eGWAS hits and the location of the QTL. Although we would not draw strong conclusions from  
513 differences between eGWAS and QTL results, those cases where they do overlap provide  
514 compelling candidates for functional study. For example, the SNP 7\_17794242 lies within a gene  
515 (Zm00001d019117) encoding a putative transmembrane protein that has been shown in  
516 temperate maize to be differentially expressed in response to salt, cold and UV (Makarevitch *et*  
517 *al.*, 2015).

518

## 519 **DISCUSSION**

520 Evaluation of a B73xPT mapping population in lowland and high elevation field sites identified  
521 QTL associated with both morphological and yield components traits. Although showing  
522 plasticity, the genetic architecture of morphological traits was conserved across environments  
523 and we saw little evidence of GEI. Indeed, characteristic highland traits such as pigmentation and  
524 pubescence were actually easier to evaluate in the lowland field as a result of the overall greater  
525 vigor of the plants. In contrast, we saw greater evidence of GEI with respect to yield  
526 components, with individual BC<sub>1</sub>S<sub>5</sub> genotypes showing the signature of local adaptation and  
527 others stability across our two test environments. This broad trend of greater stability of  
528 morphological traits rather than yield components is consistent with a previous study mapping  
529 maize adaptation across four elevations (Jiang *et al.*, 1999).

530 In total, across the different phenotypic sets, we detected 44 unique QTLs, eighteen of  
531 which present a significant QEI where the majority (17) are examples of conditional neutrality,



532 while only one (qEW7) was associated with statistical support for antagonistic pleiotropy. In a  
533 review of genetic architecture in 37 studies, the authors estimated that ~60% of the QTLs  
534 detected displayed QEI, but that there was only evidence for antagonistic pleiotropy in ~2% of  
535 cases (Des Marais *et al.*, 2013). This broad trend was reflected in a recent multisite mapping  
536 experiment in switchgrass (*Panicum virgatum L.*) in which the majority of QTL associated with  
537 adaptive traits showed conditional positive effects in their home environment with little or no  
538 detectable effect or cost in other environments (Lowry *et al.*, 2019). Detecting antagonistic  
539 pleiotropy requires higher statistical power than identification of conditional effects (*i.e.* the  
540 latter are typically supported by a failure to detect an effect in certain environments), resulting in  
541 a potential bias in the classification of QEI (Anderson *et al.*, 2011). In our study, the statistical  
542 power necessary to dissect QEI is limited by the size of the mapping population and the number  
543 of trials and locations evaluated. QTL effects for biomass, yield components changed in both  
544 magnitude and direction over location, suggesting antagonistic pleiotropy, and additional  
545 evaluation of our material may provide more evidence of this. We would also point out the  
546 extensive nature of the management employed at the lowland (Valle de Banderas) site; this site  
547 might be considered as an “ideal” environment in comparison to the highland site, exposing the  
548 plants to few of the stresses traditionally faced in tropical lowland fields. Any buffering of the  
549 potential costs of highland variants in the lowland site by management would push the genetic  
550 architecture from antagonistic pleiotropy towards conditionality.

551 We identified several QTLs that could be confidently associated with strong candidate  
552 genes. For stem pigmentation, qPINT2 and qPINT10 correspond well to the loci *b1* and *r1*,  
553 respectively. The qPINT2 locus had the greatest effect of the two (explaining ~40% variance)  
554 with the PT allele promoting pigmentation. The *b1* gene encodes a bHLH transcription factor

555 that regulates the temporal and tissue-specific expression of genes that produce anthocyanins in  
556 maize (Ludwig *et al.*, 1989; Petroni *et al.*, 2000; Chatham & Juvik, 2021). Interestingly, *b1* was  
557 also identified in a mapping cross between lowland and highland teosinte, the latter showing the  
558 stem pigmentation also seen in highland maize (Lauter *et al.*, 2004). Several independently  
559 derived *B1* alleles have been linked to stem pigmentation (Dooner & Kermicle, 1976; Radicella  
560 *et al.*, 1992; Selinger *et al.*, 1998; Selinger & Chandler, 1999, 2001; Chatham & Juvik, 2021),  
561 indicating the ready production of functional diversity at this locus and implicating convergent  
562 selection (Stern, 2013) for pigmentation among highland *Zea*, supporting an adaptive role  
563 (Doebley, 1984; Lauter *et al.*, 2004). Further sequencing of *b1* alleles from highland maize will  
564 shed greater light on patterns of diversity and the origin of different alleles. Stem pigmentation,  
565 unlike stem pubescence, is also shared with South American highland maize (Janzen *et al.*,  
566 2021). Dark red pigmentation in the stem can help the plant to absorb more solar radiation and  
567 keep the plant warmer in a cold environment and might also protect DNA from damage due to  
568 higher UV-B radiation in the highlands (Barthakur, 1974; Eagles & Lothrop, 1994; Casati &  
569 Walbot, 2005) - although it is unclear why such protection might be required more so in the stem  
570 than in the leaf blades.

571         The flowering QTL qDTA8, qDTS8 and qASI8 overlap a ~10Mb region that contains  
572 the two well-characterized flowering genes *Vgt1* and *Zcn8*. This region and/or these genes have  
573 been reproducibly detected in linkage- and association- mapping studies of maize flowering time  
574 (Chardon *et al.*, 2004; Buckler *et al.*, 2009; Steinhoff *et al.*, 2012; Li *et al.*, 2016; Romero  
575 Navarro *et al.*, 2017), temperate adaptation (Ducrocq *et al.*, 2008; Bouchet *et al.*, 2013; Guo *et al.*,  
576 2018; Castelletti *et al.*, 2020) and adaptation to the Mexican Highlands (Gates *et al.*, 2019;  
577 Janzen *et al.*, 2021; Wang *et al.*, 2021). An early flowering *vgt1* allele from northern germplasm

578 has previously been associated with a miniature transposon (MITE) insertion, although the  
579 absence of the MITE alone did not explain late flowering *vgt1* alleles (Buckler *et al.*, 2009). In a  
580 *Zcn8* association study using maize and teosinte, the haplotype associated with earliest flowering  
581 (A-Del) was hypothesised to have originated in highland teosinte (*Zea mays* ssp. *mexicana*) and  
582 to have moved to cultivated maize by introgression (Guo *et al.*, 2018). Interestingly, in this same  
583 study the authors report Palomero Toluqueño to carry both the MITE-associated allele of *vgt1*  
584 and the A-Del haplotype of *Zcn8*. Although we have not sequenced the *Vgt1* and *Zcn8* alleles  
585 present in our mapping population and available genome sequence data do not provide good  
586 coverage in this region, our linkage mapping results are consistent with this previous association  
587 analysis.

588 We identified QTLs associated with sheath pubescence on chr 3, 7, 8 and 9. Our QTL on  
589 chr 9 is consistent with previous observations co-localizing i) a leaf blade macrohair mutation in  
590 temperate maize, ii) a stem pubescence QTL in *mexicana* teosinte, iii) introgression from  
591 *mexicana* to highland maize and iv) a ~ 3 Mb inversion that displays patterns of selection in  
592 mexican highland maize (Moose *et al.*, 2004; Lauter *et al.*, 2004; Hufford *et al.*, 2013; Gonzalez-  
593 Segovia *et al.*, 2019; Calfee *et al.*, 2021). Identification of a PT allele linked to stem pubescence  
594 in this same region of chr 9 adds further support to the hypothesis of adaptive introgression at  
595 this locus (Wilkes, 1972; Gonzalez-Segovia *et al.*, 2019). In this context, it is interesting to note  
596 that all macrohair QTL identified appeared to be sufficient on their own to induce stem  
597 pubescence, although their combined action would be needed to approach the level of  
598 pubescence of the PT parent. Limitations of population size and the semi-quantitative nature of  
599 our evaluation prevent strong conclusions concerning additivity or interactions among macrohair  
600 QTL. Nonetheless, our data suggest that qMH9 is just one of a number of contributing loci, the

601 origin of the trait being a complex mix of wild-relative introgression and *de novo* mutation. Fine  
602 mapping and molecular cloning of the genes underlying macrohair QTL would allow a far more  
603 detailed view of the history of the stem pubescent trait and associated genetic variants in  
604 Mexican highland maize. Pubescence extends the boundary layer around the stem and could act  
605 as protection from cold by preventing heat loss or conserve water by minimizing transpiration  
606 (Chalker-Scott, 1999; Schuepp, 1993). We did not observe any strong correlation between  
607 pubescence and yield components. However, further experiments making use of the range of  
608 pubescence in our inbred families or derived NILs, might have the power to detect more subtle  
609 effects in either controlled conditions or large-scale highland yield trials.

610         The rich diversity of Mexican landrace maize is closely tied to local adaptation. Yet, this  
611 same specialization places these varieties at risk from future climate change (Mercer & Perales,  
612 2010)(Bellon *et al.*, 2011) (Romero *et al.*, 2020). In a study to project landrace distribution under  
613 different climate change scenarios, PT was the landrace identified as the most vulnerable (Ureta  
614 *et al.*, 2012), although, as the authors note, models based on current distribution and climate do  
615 not take into account the full range of environmental, biotic and cultural factors that impact  
616 diversity and distribution. In the specific case of PT, limited yield potential in comparison to  
617 more modern landraces is likely to see it abandoned by farmers  
618 (<https://www.biodiversidad.gob.mx/diversidad/proyectoMaices>). That said, PT has contributed to  
619 the broader Mexican highland group (Reif *et al.*, 2006; Warburton *et al.*, 2008)(Arteaga *et al.*,  
620 2016) and locally-adapted alleles will likely be conserved. The fate of the Mexican highland  
621 maize group will be influenced by their degree of resilience and ability to adapt to climate  
622 change. Although we found some evidence of antagonistic pleiotropy, PT and PT allele effects  
623 were largely stable and GEI was driven by plasticity associated with B73. As such, our data

624 would support cautious optimism that highland varieties might maintain current levels of  
625 productivity in the face of future climate change. However, if climate change results in the  
626 expansion of lower elevation varieties to the highlands, the home site advantage of traditional  
627 highland landraces might be eroded. Ultimately, the conservation of maize diversity, along with  
628 the responsible and equitable use of this unique resource, will be informed by a greater  
629 understanding of the physiological and mechanistic basis of local adaptation. With an increase in  
630 mapping resolution (for example by using larger or more diverse populations) and the  
631 availability of high quality landrace genome assemblies, it will be possible to take important  
632 further steps towards defining not just the genetic architecture but also the genes and genetic  
633 variants that underlie local adaptation in maize landraces.

634

## 635 REFERENCES

- 636 **Aguilar-Rangel MR, Chávez Montes RA, González-Segovia E, Ross-Ibarra J, Simpson JK,**  
637 **Sawers RJH. 2017.** Allele specific expression analysis identifies regulatory variation associated  
638 with stress-related genes in the Mexican highland maize landrace Palomero Toluqueño. *PeerJ* **5**:  
639 e3737.
- 640 **Alvarado-Beltrán G, López-Sánchez H, Santacruz-Varela A, Muñoz-Orozco A, Valadez-**  
641 **Moctezuma E, Gutiérrez-Espinosa MA, López PA, Gil-Muñoz A, de Dios Guerrero-**  
642 **Rodríguez J, Taboada-Gaytán OR. 2019.** Morphological variability of native maize (*Zea mays*  
643 L.) of the west highland of Puebla and east highland of Tlaxcala, Mexico. *Revista de la Facultad*  
644 *de Ciencias Agrarias UNCuvo* **51**: 217–234.
- 645 **Anderson JT, Lee C-R, Rushworth CA, Colautti RI, Mitchell-Olds T. 2013.** Genetic trade-  
646 offs and conditional neutrality contribute to local adaptation. *Molecular ecology* **22**: 699–708.
- 647 **Anderson JT, Willis JH, Mitchell-Olds T. 2011.** Evolutionary genetics of plant adaptation.  
648 *Trends in genetics: TIG* **27**: 258–266.
- 649 **Arends D, Prins P, Jansen RC, Broman KW. 2010.** R/qtl: high-throughput multiple QTL  
650 mapping. *Bioinformatics* **26**: 2990–2992.
- 651 **Arteaga MC, Moreno-Letelier A, Mastretta-Yanes A, Vázquez-Lobo A, Breña-Ochoa A,**  
652 **Moreno-Estrada A, Eguiarte LE, Piñero D. 2016.** Genomic variation in recently collected

- 653 maize landraces from Mexico. *Genomics data* **7**: 38–45.
- 654 **Assmann SM. 2013.** Natural Variation in Abiotic Stress and Climate Change Responses in  
655 Arabidopsis : Implications for Twenty-First-Century Agriculture. *International journal of plant*  
656 *sciences* **174**: 3–26.
- 657 **Barthakur N. 1974.** Temperature differences between two pigmented types of corn plants.  
658 *International journal of biometeorology* **18**: 70–75.
- 659 **Bayuelo-Jiménez JS, Gallardo-Valdéz M, Pérez-Decelis VA, Magdaleno-Armas L, Ochoa I,**  
660 **Lynch JP. 2011.** Genotypic variation for root traits of maize (*Zea mays* L.) from the Purhepecha  
661 Plateau under contrasting phosphorus availability. *Field crops research* **121**: 350–362.
- 662 **Bayuelo-Jiménez JS, Ochoa-Cadavid I. 2014.** Phosphorus acquisition and internal utilization  
663 efficiency among maize landraces from the central Mexican highlands. *Field crops research*  
664 **156**: 123–134.
- 665 **Bellon MR, Hodson D, Bergvinson D, Beck D, Martinez-Romero E, Montoya Y. 2005.**  
666 Targeting agricultural research to benefit poor farmers: Relating poverty mapping to maize  
667 environments in Mexico. *Food policy* **30**: 476–492.
- 668 **Bellon MR, Hodson D, Hellin J. 2011.** Assessing the vulnerability of traditional maize seed  
669 systems in Mexico to climate change. *Proceedings of the National Academy of Sciences of the*  
670 *United States of America* **108**: 13432–13437.
- 671 **Bellon MR, Mastretta-Yanes A, Ponce-Mendoza A, Ortiz-Santamaría D, Oliveros-Galindo**  
672 **O, Perales H, Acevedo F, Sarukhán J. 2018.** Evolutionary and food supply implications of  
673 ongoing maize domestication by Mexican. *Proceedings. Biological sciences / The Royal Society*  
674 **285**.
- 675 **Bouchet S, Servin B, Bertin P, Madur D, Combes V, Dumas F, Brunel D, Laborde J,**  
676 **Charcosset A, Nicolas S. 2013.** Adaptation of maize to temperate climates: mid-density  
677 genome-wide association genetics and diversity patterns reveal key genomic regions, with a  
678 major contribution of the Vgt2 (ZCN8) locus. *PloS one* **8**: e71377.
- 679 **Bradbury PJ, Zhang Z, Kroon DE, Casstevens TM, Ramdoss Y, Buckler ES. 2007.**  
680 TASSEL: software for association mapping of complex traits in diverse samples. *Bioinformatics*  
681 **23**: 2633–2635.
- 682 **Breseghele F, Coelho ASG. 2013.** Traditional and modern plant breeding methods with  
683 examples in rice (*Oryza sativa* L.). *Journal of agricultural and food chemistry* **61**: 8277–8286.
- 684 **Broman KW, Wu H, Sen S, Churchill GA. 2003.** R/qt1: QTL mapping in experimental crosses.  
685 *Bioinformatics* **19**: 889–890.
- 686 **Buckler ES, Holland JB, Bradbury PJ, Acharya CB, Brown PJ, Browne C, Ersoz E, Flint-**  
687 **Garcia S, Garcia A, Glaubitz JC, et al. 2009.** The genetic architecture of maize flowering time.  
688 *Science* **325**: 714–718.



- 689 **Calfee E, Gates D, Lorant A, Taylor Perkins M, Coop G, Ross-Ibarra J. 2021.** Selective  
690 sorting of ancestral introgression in maize and teosinte along an elevational cline. *bioRxiv*:  
691 2021.03.05.434040.
- 692 **Casati P, Walbot V. 2005.** Differential accumulation of maysin and rhamnosylisoorientin in  
693 leaves of high-altitude landraces of maize after UV-B exposure. *Plant, cell & environment* **28**:  
694 788–799.
- 695 **Castelletti S, Coupel-Ledru A, Granato I, Palaffre C, Cabrera-Bosquet L, Tonelli C,  
696 Nicolas SD, Tardieu F, Welcker C, Conti L. 2020.** Maize adaptation across temperate climates  
697 was obtained via expression of two florigen genes. *PLoS genetics* **16**: e1008882.
- 698 **Chandler VL, Radicella JP, Robbins TP, Chen J, Turks' D. 1989.** Two Regulatory Genes of  
699 the Maize Anthocyanin Pathway Are Homologous: Isolation of B Utilizing R Genomic  
700 Sequences. *The Plant Cell*.
- 701 **Chardon F, Virlon B, Moreau L, Falque M, Joets J, Decousset L, Murigneux A, Charcosset  
702 A. 2004.** Genetic architecture of flowering time in maize as inferred from quantitative trait loci  
703 meta-analysis and synteny conservation with the rice genome. *Genetics* **168**: 2169–2185.
- 704 **Chatham LA, Juvik JA. 2021.** Linking anthocyanin diversity, hue, and genetics in purple corn.  
705 *G3* **11**.
- 706 **CIMMYT, Bjarnason MS. 1994.** The Subtropical, Midaltitude, and Highland Maize  
707 Subprogram. viii.
- 708 **Cleveland DA, Soleri D. 2007.** Extending Darwin's Analogy: Bridging Differences in Concepts  
709 of Selection between Farmers, Biologists, and Plant Breeders. *Economic botany* **61**: 121–136.
- 710 **Coles ND, McMullen MD, Balint-Kurti PJ, Pratt RC, Holland JB. 2010.** Genetic control of  
711 photoperiod sensitivity in maize revealed by joint multiple population analysis. *Genetics* **184**:  
712 799–812.
- 713 **CONABIO. 2018.** Maíz. *Biodiversidad Mexicana*.
- 714 **Corrado G, Rao R. 2017.** Towards the Genomic Basis of Local Adaptation in Landraces.  
715 *Diversity* **9**: 51.
- 716 **Crow T, Ta J, Nojoomi S, Aguilar-Rangel MR, Torres Rodríguez JV, Gates D, Rellán-  
717 Álvarez R, Sawers R, Runcie D. 2020.** Gene regulatory effects of a large chromosomal  
718 inversion in highland maize. *PLoS genetics* **16**: e1009213.
- 719 **Cruz-Ramírez A, López-Bucio J, Ramírez-Pimentel G, Zurita-Silva A, Sánchez-Calderon  
720 L, Ramírez-Chávez E, González-Ortega E, Herrera-Estrella L. 2004.** The xiptl mutant of  
721 Arabidopsis reveals a critical role for phospholipid metabolism in root system development and  
722 epidermal cell integrity. *The Plant cell* **16**: 2020–2034.
- 723 **Des Marais DL, Hernandez KM, Juenger TE. 2013.** Genotype-by-Environment Interaction

- 724 and Plasticity: Exploring Genomic Responses of Plants to the Abiotic Environment. *Annual*  
725 *review of ecology, evolution, and systematics* **44**: 5–29.
- 726 **Doebley JF. 1984.** Maize Introgression Into Teosinte—A Reappraisal. *Annals of the Missouri*  
727 *Botanical Garden. Missouri Botanical Garden* **71**: 1100–1113.
- 728 **Dooner HK, Kermicle JL. 1976.** Displaced and tandem duplications in the long arm of  
729 chromosome 10 in maize. *Genetics* **82**: 309–322.
- 730 **Ducrocq S, Madur D, Veyrieras J-B, Camus-Kulandaivelu L, Kloiber-Maitz M, Presterl T,**  
731 **Ozunova M, Manicacci D, Charcosset A. 2008.** Key impact of Vgt1 on flowering time  
732 adaptation in maize: evidence from association mapping and ecogeographical information.  
733 *Genetics* **178**: 2433–2437.
- 734 **Dwivedi SL, Ceccarelli S, Blair MW, Upadhyaya HD, Are AK, Ortiz R. 2016.** Landrace  
735 Germplasm for Improving Yield and Abiotic Stress Adaptation. *Trends in plant science* **21**: 31–  
736 42.
- 737 **Eagles HA, Lothrop JE. 1994.** Highland Maize from Central Mexico—Its Origin,  
738 Characteristics, and Use in Breeding Programs. *Crop Science* **34**: 11–19.
- 739 **Edet OU, Gorafi YSA, Nasuda S, Tsujimoto H. 2018.** DArTseq-based analysis of genomic  
740 relationships among species of tribe Triticeae. *Scientific reports* **8**: 16397.
- 741 **El-Soda M, Malosetti M, Zwaan BJ, Koornneef M, Aarts MGM. 2014.** Genotype ×  
742 environment interaction QTL mapping in plants: lessons from Arabidopsis. *Trends in plant*  
743 *science* **19**: 390–398.
- 744 **Emon RM, Islam MM, Halder J, Fan Y. 2015.** Genetic diversity and association mapping for  
745 salinity tolerance in Bangladeshi rice landraces. *The Crop Journal* **3**: 440–444.
- 746 **Espinosa-Calderón A, Robledo-Tadeo M, Montiel NG, Macías MS, Vargas JV, Caballero**  
747 **AP, Hernández FC, Carrillo GV, Rodríguez Montalvo FA. 2011.** ‘V-55 A’, A MAIZE  
748 VARIETY OF YELLOW GRAIN FOR MEXICAN HIGHLANDS. *Nueva Variedad Rev. Fitotec.*  
749 *Mex. Vol* **34**: 149–150.
- 750 **Fournier-Level A, Korte A, Cooper MD, Nordborg M, Schmitt J, Wilczek AM. 2011.** A  
751 map of local adaptation in Arabidopsis thaliana. *Science* **334**: 86–89.
- 752 **Galván-Tejada NC, Peña-Ramírez V, Mora-Palomino L, Siebe C. 2014.** Soil P fractions in a  
753 volcanic soil chronosequence of Central Mexico and their relationship to foliar P in pine trees.  
754 *Journal of Plant Nutrition and Soil Science* **177**: 792–802.
- 755 **Gardner KM, Latta RG. 2006.** Identifying loci under selection across contrasting environments  
756 in Avena barbata using quantitative trait locus mapping. *Molecular ecology* **15**: 1321–1333.
- 757 **Gates DJ, Runcie D, Janzen GM, Navarro AR, Willcox M, Sonder K, Snodgrass SJ,**  
758 **Rodríguez-Zapata F, Sawers RJH, Rellán-Álvarez R, et al. 2019.** Single-gene resolution of



- 759 locally adaptive genetic variation in Mexican maize. *bioRxiv*: 706739.
- 760 **Gonzalez-Segovia E, Pérez-Limon S, Cíntora-Martínez GC, Guerrero-Zavala A, Janzen**  
761 **GM, Hufford MB, Ross-Ibarra J, Sawers RJH. 2019.** Characterization of introgression from  
762 the teosinte *Zea mays* ssp. *mexicana* to Mexican highland maize. *PeerJ* **7**: e6815.
- 763 **Guo L, Wang X, Zhao M, Chen Q, Doebley JF, Tian F, Huang C, Li C, Li D, Yang CJ, et**  
764 **al. 2018.** Stepwise cis-Regulatory Changes in ZCN8 Contribute to Maize Flowering-Time  
765 Adaptation | Elsevier Enhanced Reader. *Current biology: CB*: 3005–3015.
- 766 **Hall MC, Lowry DB, Willis JH. 2010.** Is local adaptation in *Mimulus guttatus* caused by trade-  
767 offs at individual loci? *Molecular ecology* **19**: 2739–2753.
- 768 **Hufford MB, Lubinsky P, Pyhäjärvi T, Devengenzo MT, Ellstrand NC, Ross-Ibarra J.**  
769 **2013.** The genomic signature of crop-wild introgression in maize. *PLoS genetics* **9**: e1003477.
- 770 **Iowa State University. 2009.** Researchers provide understanding to maize genome sequence.  
771 *Science Daily*.
- 772 **Janzen GM, Aguilar-Rangel MR, Cíntora-Martínez C, Blöcher-Juárez KA, González-**  
773 **Segovia E, Studer AJ, Runcie DE, Flint-Garcia SA, Rellán-Álvarez R, Sawers RJH, et al.**  
774 **2021.** Demonstration of local adaptation of maize landraces by reciprocal transplantation.  
775 *bioRxiv*: 2021.03.25.437076.
- 776 **Jiang C, Edmeades GO, Armstead I, Lafitte HR, Hayward MD, Hoisington D. 1999.**  
777 Genetic analysis of adaptation differences between highland and lowland tropical maize using  
778 molecular markers. *TAG. Theoretical and applied genetics. Theoretische und angewandte*  
779 *Genetik* **99**: 1106–1119.
- 780 **Jiang H, Wong WH. 2008.** SeqMap: mapping massive amount of oligonucleotides to the  
781 genome. *Bioinformatics* **24**: 2395–2396.
- 782 **Jiao Y, Peluso P, Shi J, Liang T, Stitzer MC, Wang B, Campbell MS, Stein JC, Wei X,**  
783 **Chin C-S, et al. 2017.** Improved maize reference genome with single-molecule technologies.  
784 *Nature* **546**: 524–527.
- 785 **Juenger TE. 2013.** Natural variation and genetic constraints on drought tolerance. *Current*  
786 *opinion in plant biology* **16**: 274–281.
- 787 **Körner C. 2007.** The use of ‘altitude’ in ecological research. *Trends in ecology & evolution* **22**:  
788 569–574.
- 789 **Latta RG, Gardner KM, Johansen-Morris AD. 2007.** Hybridization, recombination, and the  
790 genetic basis of fitness variation across environments in *Avena barbata*. *Genetica* **129**: 167–177.
- 791 **Latta RG, Gardner KM, Staples DA. 2010.** Quantitative trait locus mapping of genes under  
792 selection across multiple years and sites in *Avena barbata*: epistasis, pleiotropy, and genotype-  
793 by-environment interactions. *Genetics* **185**: 375–385.

- 794 **Lauter N, Gustus C, Westerbergh A, Doebley J. 2004.** The inheritance and evolution of leaf  
795 pigmentation and pubescence in teosinte. *Genetics* **167**: 1949–1959.
- 796 **Li Y-X, Li C, Bradbury PJ, Liu X, Lu F, Romay CM, Glaubitz JC, Wu X, Peng B, Shi Y, et**  
797 **al. 2016.** Identification of genetic variants associated with maize flowering time using an  
798 extremely large multi-genetic background population. *The Plant journal: for cell and molecular*  
799 *biology* **86**: 391–402.
- 800 **Louette D, Charrier A, Berthaud J. 1997.** In Situ conservation of maize in Mexico: Genetic  
801 diversity and Maize seed management in a traditional community. *Economic botany* **51**: 20–38.
- 802 **Lovell JT, MacQueen AH, Mamidi S, Bonnette J, Jenkins J, Napier JD, Sreedasyam A,**  
803 **Healey A, Session A, Shu S, et al. 2021.** Genomic mechanisms of climate adaptation in  
804 polyploid bioenergy switchgrass. *Nature* **590**: 438–444.
- 805 **Lowry DB, Hall MC, Salt DE, Willis JH. 2009.** Genetic and physiological basis of adaptive  
806 salt tolerance divergence between coastal and inland *Mimulus guttatus*. *The New phytologist*  
807 **183**: 776–788.
- 808 **Lowry DB, Lovell JT, Zhang L, Bonnette J, Fay PA, Mitchell RB, Lloyd-Reilley J, Boe AR,**  
809 **Wu Y, Rouquette FM Jr, et al. 2019.** QTL × environment interactions underlie adaptive  
810 divergence in switchgrass across a large latitudinal gradient. *Proceedings of the National*  
811 *Academy of Sciences of the United States of America* **116**: 12933–12941.
- 812 **Ludwig SR, Habera LF, Dellaporta SL, Wessler SR. 1989.** Lc, a member of the maize R gene  
813 family responsible for tissue-specific anthocyanin production, encodes a protein similar to  
814 transcriptional activators and contains the myc-homology region. *Proceedings of the National*  
815 *Academy of Sciences of the United States of America* **86**: 7092–7096.
- 816 **Makarevitch I, Waters AJ, West PT, Stitzer M, Hirsch CN, Ross-Ibarra J, Springer NM.**  
817 **2015.** Transposable elements contribute to activation of maize genes in response to abiotic stress.  
818 *PLoS genetics* **11**: e1004915.
- 819 **Matsuoka Y, Vigouroux Y, Goodman MM, Sanchez G. J, Buckler E, Doebley J. 2002.** A  
820 single domestication for maize shown by multilocus microsatellite genotyping. *Proceedings of*  
821 *the National Academy of Sciences* **99**: 6080–6084.
- 822 **McCarthy DJ, Chen Y, Smyth GK. 2012.** Differential expression analysis of multifactor RNA-  
823 Seq experiments with respect to biological variation. *Nucleic acids research* **40**: 4288–4297.
- 824 **McWilliam JR, Naylor AW. 1967.** Temperature and plant adaptation. I. Interaction of  
825 temperature and light in the synthesis of chlorophyll in corn. *Plant physiology* **42**: 1711–1715.
- 826 **Meng X, Muszynski MG, Danilevskaya ON. 2011.** The FT-like ZCN8 Gene Functions as a  
827 Floral Activator and Is Involved in Photoperiod Sensitivity in Maize. *The Plant cell* **23**: 942–960.
- 828 **Mercer K, Martínez-Vásquez Á, Perales HR. 2008.** Asymmetrical local adaptation of maize  
829 landraces along an altitudinal gradient. *Evolutionary applications* **1**: 489–500.

- 830 **Mercer KL, Perales HR. 2010.** Evolutionary response of landraces to climate change in centers  
831 of crop diversity. *Evolutionary Applications* **3**: 480–493.
- 832 **Mercer KL, Perales H. 2019.** Structure of local adaptation across the landscape: flowering time  
833 and fitness in Mexican maize (*Zea mays* L. subsp. *mays*) landraces. *Genetic resources and crop*  
834 *evolution* **66**: 27–45.
- 835 **Miao C, Fang J, Li D, Liang P, Zhang X, Yang J, Schnable JC, Tang H. 2018.** Genotype-  
836 Corrector: improved genotype calls for genetic mapping in F and RIL populations. *Scientific*  
837 *reports* **8**: 10088.
- 838 **Mitchell-Olds T, Willis JH, Goldstein DB. 2007.** Which evolutionary processes influence  
839 natural genetic variation for phenotypic traits? *Nature reviews. Genetics* **8**: 845–856.
- 840 **Moose SP, Lauter N, Carlson SR. 2004.** The maize macrohairless1 locus specifically promotes  
841 leaf blade macrohair initiation and responds to factors regulating leaf identity. *Genetics* **166**:  
842 1451–1461.
- 843 **Nakamura Y, Andrés F, Kanehara K, Liu Y-C, Dörmann P, Coupland G. 2014.** Arabidopsis  
844 florigen FT binds to diurnally oscillating phospholipids that accelerate flowering. *Nature*  
845 *communications* **5**: 3553.
- 846 **Olivoto T, Lúcio ADC, Silva JAG, Marchioro VS, Souza VQ, Jost E. 2019.** Mean  
847 performance and stability in multi-environment trials I: Combining features of AMMI and BLUP  
848 techniques. *Agronomy journal* **111**: 2949–2960.
- 849 **Perales H, Golicher D. 2014.** Mapping the diversity of maize races in Mexico. *PloS one* **9**:  
850 e114657.
- 851 **Petroni K, Cominelli E, Consonni G, Gusmaroli G, Gavazzi G, Tonelli C. 2000.** The  
852 developmental expression of the maize regulatory gene Hopi determines germination-dependent  
853 anthocyanin accumulation. *Genetics* **155**: 323–336.
- 854 **Piperno DR, Moreno JE, Iriarte J, Holst I, Lachniet M, Jones JG, Ranere AJ, Castanzo R.**  
855 **2007.** Late Pleistocene and Holocene environmental history of the Iguala Valley, Central Balsas  
856 Watershed of Mexico. *Proceedings of the National Academy of Sciences of the United States of*  
857 *America* **104**: 11874–11881.
- 858 **Radicella JP, Brown D, Tolar LA, Chandler VL. 1992.** Allelic diversity of the maize B  
859 regulatory gene: different leader and promoter sequences of two B alleles determine distinct  
860 tissue specificities of anthocyanin production. *Genes & development* **6**: 2152–2164.
- 861 **R Core Team. 2019.** R: A Language and Environment for Statistical Computing.
- 862 **Reif JC, Warburton ML, Xia XC, Hoisington DA, Crossa J, Taba S, Muminović J, Bohn**  
863 **M, Frisch M, Melchinger AE. 2006.** Grouping of accessions of Mexican races of maize  
864 revisited with SSR markers. *TAG. Theoretical and applied genetics. Theoretische und*  
865 *angewandte Genetik* **113**: 177–185.

- 866 **Reuscher S, Furuta T. 2016.** ABHgenotypeR: Easy Visualization of ABH Genotypes.
- 867 **Robinson MD, McCarthy DJ, Smyth GK. 2010.** edgeR: a Bioconductor package for  
868 differential expression analysis of digital gene expression data. *Bioinformatics* **26**: 139–140.
- 869 **Rodríguez-Zapata F, Barnes AC, Blöcher-Juárez KA, Gates D, Kur A, Wang L, Janzen**  
870 **GM, Jensen S, Estévez-Palmas JM, Crow T, et al. 2021.** Teosinte introgression modulates  
871 phosphatidylcholine levels and induces early maize flowering time. *bioRxiv*: 2021.01.25.426574.
- 872 **Romero Navarro JA, Willcox M, Burgueño J, Romay C, Swarts K, Trachsel S, Preciado E,**  
873 **Terron A, Delgado HV, Vidal V, et al. 2017.** A study of allelic diversity underlying flowering-  
874 time adaptation in maize landraces. *Nature genetics* **49**: 476–480.
- 875 **Romero AA, Rivas AIM, Díaz JDG, Mendoza MÁP, Salas ENN, Blanco JL, Álvarez ACC.**  
876 **2020.** Crop yield simulations in Mexican agriculture for climate change adaptation. *Atmósfera*.
- 877 **Ruiz Corral JA, Durán Puga N, Sánchez González J de J, Ron Parra J, González Eguiarte**  
878 **DR, Holland JB, Medina García G. 2008.** Climatic Adaptation and Ecological Descriptors of  
879 42 Mexican Maize Races. *Crop science* **48**: 1502–1512.
- 880 **Salvi S, Sponza G, Morgante M, Tomes D, Niu X, Fengler KA, Meeley R, Ananiev EV,**  
881 **Svitashev S, Bruggemann E, et al. 2007.** Conserved noncoding genomic sequences associated  
882 with a flowering-time quantitative trait locus in maize. *Proceedings of the National Academy of*  
883 *Sciences of the United States of America* **104**: 11376–11381.
- 884 **Sánchez Martínez ES. 2018.** [Functional characterization of *Zea mays* Xipotl  
885 (phosphoethanolamine N-methyltransferase, PEAMT) family genes] =Caracterización funcional  
886 de la familia de genes Xipotl (fosfoetanolamina N-metiltransferasa, PEAMT) de *Zea mays*.
- 887 **Scarcelli N, Cheverud JM, Schaal BA, Kover PX. 2007.** Antagonistic pleiotropic effects  
888 reduce the potential adaptive value of the FRIGIDA locus. *Proceedings of the National Academy*  
889 *of Sciences of the United States of America* **104**: 16986–16991.
- 890 **Scheiner SM. 1993.** Genetics and Evolution of Phenotypic Plasticity. *Annual review of ecology*  
891 *and systematics* **24**: 35–68.
- 892 **Schnable PS, Ware D, Fulton RS, Stein JC, Wei F, Pasternak S, Liang C, Zhang J, Fulton**  
893 **L, Graves TA, et al. 2009.** The B73 maize genome: complexity, diversity, and dynamics.  
894 *Science* **326**: 1112–1115.
- 895 **Selinger DA, Chandler VL. 1999.** Major recent and independent changes in levels and patterns  
896 of expression have occurred at the b gene, a regulatory locus in maize. *Proceedings of the*  
897 *National Academy of Sciences of the United States of America* **96**: 15007–15012.
- 898 **Selinger DA, Chandler VL. 2001.** B-Bolivia, an Allele of the Maize b1 Gene with Variable  
899 Expression, Contains a High Copy Retrotransposon- Related Sequence Immediately Upstream1.  
900 *Plant Physiology*: 1363–1379.

- 901 **Selinger DA, Lisch D, Chandler VL. 1998.** The maize regulatory gene B-Peru contains a DNA  
902 rearrangement that specifies tissue-specific expression through both positive and negative  
903 promoter elements. *Genetics* **149**: 1125–1138.
- 904 **Sigmon B, Vollbrecht E. 2010.** Evidence of selection at the ramosal locus during maize  
905 domestication. *Molecular ecology* **19**: 1296–1311.
- 906 **Sousaraei N, Torabi B, Mashaieki K, Soltani E, Mousavizadeh SJ. 2021.** Variation of seed  
907 germination response to temperature in tomato landraces: An adaptation strategy to  
908 environmental conditions. *Scientia horticultrae* **281**: 109987.
- 909 **Steinhoff J, Liu W, Reif JC, Della Porta G, Ranc N, Würschum T. 2012.** Detection of QTL  
910 for flowering time in multiple families of elite maize. *TAG. Theoretical and applied genetics. Theoretische und angewandte Genetik* **125**: 1539–1551.
- 912 **Stern DL. 2013.** The genetic causes of convergent evolution. *Nature reviews. Genetics* **14**: 751–  
913 764.
- 914 **Taylor J, Butler D. 2017.** R Package ASMap: Efficient Genetic Linkage Map Construction and  
915 Diagnosis. *Journal of Statistical Software, Articles* **79**: 1–29.
- 916 **Todesco M, Balasubramanian S, Hu TT, Traw MB, Horton M, Epple P, Kuhns C,  
917 Sureshkumar S, Schwartz C, Lanz C, et al. 2010.** Natural allelic variation underlying a major  
918 fitness trade-off in *Arabidopsis thaliana*. *Nature* **465**: 632–636.
- 919 **Troyer AF. 1999.** Background of U.S. Hybrid Corn. *Crop science* **39**:  
920 crops1999.0011183X003900020001x.
- 921 **Ureta C, Martínez-Meyer E, Perales HR, Álvarez-Buylla ER. 2012.** Projecting the effects of  
922 climate change on the distribution of maize races and their wild relatives in Mexico. *Global  
923 change biology* **18**: 1073–1082.
- 924 **Vega-Arreguín JC, Ibarra-Laclette E, Jiménez-Moraila B, Martínez O, Vielle-Calzada JP,  
925 Herrera-Estrella L, Herrera-Estrella A. 2009.** Deep sampling of the Palomero maize  
926 transcriptome by a high throughput strategy of pyrosequencing. *BMC genomics* **10**: 299.
- 927 **Verhoeven KJF, Poorter H, Nevo E, Biere A. 2008.** Habitat-specific natural selection at a  
928 flowering-time QTL is a main driver of local adaptation in two wild barley populations.  
929 *Molecular ecology* **17**: 3416–3424.
- 930 **Verhoeven KJF, Vanhala TK, Biere A, Nevo E, van Damme JMM. 2004.** The genetic basis  
931 of adaptive population differentiation: A quantitative trait locus analysis of fitness traits in two  
932 wild barley populations from contrasting habitats. *Evolution; international journal of organic  
933 evolution* **58**: 270.
- 934 **Vielle-Calzada J-P, Martínez de la Vega O, Hernández-Guzmán G, Ibarra-Laclette E,  
935 Alvarez-Mejía C, Vega-Arreguín JC, Jiménez-Moraila B, Fernández-Cortés A, Corona-  
936 Armenta G, Herrera-Estrella L, et al. 2009.** The Palomero genome suggests metal effects on



- 937 domestication. *Science* **326**: 1078.
- 938 **Wang L, Josephs EB, Lee KM, Roberts LM, Rellán-Álvarez R, Ross-Ibarra J, Hufford**  
939 **MB. 2021.** Molecular Parallelism Underlies Convergent Highland Adaptation of Maize  
940 Landraces. *Molecular biology and evolution*.
- 941 **Warburton ML, Reif JC, Frisch M, Bohn M, Bedoya C, Xia XC, Crossa J, Franco J,**  
942 **Hoisington D, Pixley K, et al. 2008.** Genetic Diversity in CIMMYT Nontemperate Maize  
943 Germplasm: Landraces, Open Pollinated Varieties, and Inbred Lines. *Crop Science* **48**: 617–624.
- 944 **Weinig C, Dorn LA, Kane NC, German ZM, Halldorsdottir SS, Ungerer MC, Toyonaga Y,**  
945 **Mackay TFC, Purugganan MD, Schmitt J. 2003.** Heterogeneous selection at specific loci in  
946 natural environments in *Arabidopsis thaliana*. *Genetics* **165**: 321–329.
- 947 **Wellhausen EJ, Roberts LM, Hernandez-X. H. 1951.** *Razas de Maíz en México, su origen,*  
948 *características y distribución* (PC Mangelsdorf, Ed.). Secretaría de Agricultura y Ganadería de  
949 México D. F.; Fundación Rockefeller.
- 950 **Wilkes HG. 1972.** Maize and its wild relatives. *Science* **177**: 1071–1077.
- 951 **Xu G, Wang X, Huang C, Xu D, Li D, Tian J, Chen Q, Wang C, Liang Y, Wu Y, et al. 2017.**  
952 Complex genetic architecture underlies maize tassel domestication. *The New phytologist* **214**:  
953 852–864.
- 954 **Zeven AC. 1998.** Landraces: A review of definitions and classifications. *Euphytica/ Netherlands*  
955 *journal of plant breeding* **104**: 127–139.
- 956 **FUNDING SOURCES**
- 957 Consejo Nacional de Ciencia y Tecnología [Mexico] (FOINS-2016-01)  
958 Consejo Nacional de Ciencia y Tecnología [Mexico] (CB-2015-01 254012)  
959 Secretaria de Agricultura y Desarrollo Rural (Ministry of Agriculture and Rural Development:  
960 SADER) of the Government of Mexico under the MasAgro (Sustainable Modernization of  
961 Traditional Agriculture) initiative  
962 National Science Foundation [USA] (No. 1546719)  
963 UC-MEXUS (CN-15-1476)  
964 RJHS is supported by the USDA National Institute of Food and Agriculture and Hatch  
965 Appropriations under Project #PEN04734 and Accession #1021929.

966 **Table 1: Description of phenotypic traits measured at two locations. The significance of**  
 967 **location effect was calculated using a Wilcoxon test for count and scale data (i.e., TBN,**  
 968 **KPR, KRN, P\_INT and Hair\_score), and likelihood ratio test was conducted for the other**  
 969 **continuous traits. Note: \*:  $p < 0.05$ ; \*\*:  $p < 0.001$ ; \*\*\*:  $p < 0.0001$ .**  
 970

| Phenotypic traits | Description               | Unit  | Mean (MT) | Mean (VB) | Significance of E |
|-------------------|---------------------------|-------|-----------|-----------|-------------------|
| DTA               | Days to anthesis          | Day   | 131.07    | 59.69     | < 0.0001***       |
| DTS               | Days to silking           | Day   | 131.30    | 60.15     | < 0.0001***       |
| ASI               | Anthesis-silking interval | Day   | 0.46      | 0.30      | 0.5650            |
| PH                | Plant height              | cm    | 122.72    | 148.65    | 0.0546            |
| TBN               | Tassel branch number      | Count | 4         | 5         | 0.1796            |
| EW                | Ear weight                | g     | 19.60     | 42.69     | 0.0019**          |
| EL                | Ear length                | cm    | 7.30      | 8.75      | 0.0860            |
| ED                | Ear diameter              | cm    | 3.18      | 3.83      | 0.0083**          |
| EH                | Ear height                | cm    | 49.68     | 65.30     | 0.0260*           |
| KRN               | Number of kernel rows     | Count | 14        | 17        | 0.0157*           |

|       |                               |                                                                             |       |        |          |
|-------|-------------------------------|-----------------------------------------------------------------------------|-------|--------|----------|
| KPR   | Number of kernels per row     | Count                                                                       | 13    | 20     | 0.0275*  |
| TKW   | Total kernel weight           | g                                                                           | 15.31 | 36.50  | 0.0002** |
| TKN   | Total kernel number           | Count                                                                       | 94.44 | 210.14 | 0.0001** |
| TL    | Tassel length                 | mm                                                                          | 21.65 | 28.35  | 0.0573   |
| P_INT | Anthocyanin pigment intensity | visual 0-4 code scale                                                       | 2     | 0      | 0.5303   |
| MH    | Macrohair score               | Hair pattern <= 1, hair score =0; Hair patten >1, hair score = hair density | 0     | 0      | ---      |

971  
972  
973



974 **Table 2: QTLs detected in the B73 x PT BC<sub>1</sub>S<sub>5</sub> RIL population for the phenotypes (Trait,**  
 975 **abbreviated as in Table 1) and datasets (Set Detected) analyzed. Marker column describes**  
 976 **the marker linked to the QTL, chr: chromosome; Pos: genetic position of the QTL LOD**  
 977 **peak (cM); P\_pos: physical position of the QTL LOD peak (MB, Reference genome v4), SI:**  
 978 **Support Interval of the QTL (MB); GxE: indicates if the QTL is detected in the GxE data**  
 979 **set; %VE: additive variance explained by the QTL in the multi-QTL model.**  
 980

| QTL    | Marker      | Chr | pos   | p_pos  | Set Detected     | SI              | GxE | % VE          |
|--------|-------------|-----|-------|--------|------------------|-----------------|-----|---------------|
| qASI1  | 1_53029437  | 1   | 30.46 | 53.03  | VB               | 35.2 - 292.18   |     | 10.13         |
| qASI2  | 2_241675850 | 2   | 77.91 | 241.68 | GEN, VB          | 240.52 - 244.41 |     | 10.88 - 14.54 |
| qASI3  | 3_229390098 | 3   | 65.63 | 229.39 | GEN              | 11.85 - 234.87  |     | 7.29          |
| qASI8  | 8_135484500 | 8   | 24    | 135.48 | GEN, VB, MT      | 134.32 - 164.79 |     | 15.96 - 18    |
| qDTA1  | 1_286172395 | 1   | 94.35 | 286.17 | VB, GxE          | 2.81 - 306.46   | *   | 6.07 - 10.19  |
| qDTA6  | 6_166664744 | 6   | 22    | 166.66 | GEN, MT, GxE     | 165.39 - 168.82 | *   | 7.5 - 13.53   |
| qDTA7  | 7_165928844 | 7   | 48.37 | 165.93 | MT               | 0.84 - 173.75   |     | 5.51          |
| qDTA8a | 8_21391040  | 8   | 0     | 21.39  | MT               | 25.12 - 97.57   |     | 9.45          |
| qDTA8b | 8_153580487 | 8   | 27.5  | 153.58 | GEN, VB, MT, GxE | 148.95 - 161.29 | *   | 9.67 - 21.23  |
| qDTS1  | 1_12171293  | 1   | 12.47 | 12.17  | GxE              | 2.81 - 306.46   | *   | 5.18          |
| qDTS6  | 6_166506716 | 6   | 23    | 166.51 | GEN, MT, GxE     | 165.39 - 168.12 | *   | 7.59 - 15.18  |
| qDTS7  | 7_163657186 | 7   | 48    | 163.66 | MT               | 15.91 - 169.56  |     | 8.16          |
| qDTS8  | 8_161289005 | 8   | 31    | 161.29 | GEN, MT, GxE     | 133.04 - 169.05 | *   | 11.17 - 16.07 |
| qED4   | 4_179539232 | 4   | 41.65 | 179.54 | GEN, VB          | 163.36 - 196.26 |     | 14.69 - 14.96 |
| qED5   | 5_190812247 | 5   | 31.54 | 190.81 | VB               | 1.48 - 198.95   |     | 9.2           |
| qED8   | 8_975706666 | 8   | 7.81  | 97.57  | GxE              | 21.39 - 112.91  | *   | 14.86         |
| qEH1   | 1_177987239 | 1   | 53.68 | 177.99 | GEN, MT          | 162.88 - 198.3  |     | 11.87 - 14.99 |
| qEH7   | 7_135399817 | 7   | 33.26 | 135.4  | GEN, VB, MT      | 131.23 - 144.37 |     | 14.94 - 16.76 |
| qEL3   | 3_190627575 | 3   | 43.33 | 190.63 | MT               | 11.5 - 234.87   |     | 13.39         |
| qEL4   | 4_74666833  | 4   | 23.02 | 74.67  | GxE              | 18.12 - 161.42  | *   | 12.34         |

|          |                  |    |            |        |              |                 |   |               |
|----------|------------------|----|------------|--------|--------------|-----------------|---|---------------|
| qEL7     | 7_172341845      | 7  | 55         | 172.34 | VB           | 166.94 - 181.12 |   | 12.16         |
| qEL8     | 8_175513459      | 8  | 43.5       | 175.51 | GEN, VB, GxE | 172.04 - 179.51 | * | 9.25 - 14.81  |
| qEW7     | 7_20110508       | 7  | 16.9       | 20.11  | GxE          | 9.14 - 28.5     | * | 14.33         |
| qEW8     | 8_110436593      | 8  | 13.45      | 110.44 | GxE          | 88.36 - 170.14  | * | 11.6          |
| qMH3     | 3_156124621      | 3  | 28.83      | 156.12 | GEN, VB      | 11.85 - 161.43  |   | 9.43 - 11.07  |
| qMH7     | 7_155328976      | 7  | 43.1       | 155.33 | GEN, MT      | 152.38 - 164.52 |   | 14.21 - 17.8  |
| qMH8     | 8_122414801      | 8  | 18.71      | 122.41 | VB, GxE      | 115.01 - 123.81 | * | 15.42 - 17.91 |
| qMH9     | 9_65716548       | 9  | 12.5       | 65.72  | GEN, VB      | 20.72 - 124.18  |   | 16.61 - 19    |
| qKPR8    | 8_135484500      | 8  | 24         | 135.48 | GxE          | 115.01 - 164.79 | * | 18.86         |
| qKRN1    | 1_161556632      | 1  | 49.5       | 161.56 | VB           | 8.68 - 296.87   |   | 12.63         |
| qKRN8    | 8_133038186      | 8  | 23.42      | 133.04 | GxE          | 82.76 - 164.79  | * | 16.39         |
| qP_INT2  | 2_19456739       | 2  | 25.61      | 19.46  | GEN, VB, MT  | 18.31 - 25.87   |   | 22.12 - 40.03 |
| qP_INT10 | 10_11796399<br>5 | 10 | 19.49      | 117.96 | GEN, VB, MT  | 116.16 - 138.71 |   | 9.47 - 13.37  |
| qPH1a    | 1_197051908      | 1  | 56.5       | 197.05 | GEN, VB, MT  | 176 - 199.71    |   | 18.88 - 20.43 |
| qPH1b    | 1_293830327      | 1  | 100.1<br>3 | 293.83 | VB           | 283.08 - 299.44 |   | 12.26         |
| qPH8     | 8_149541560      | 8  | 27.58      | 149.54 | VB           | 142.92 - 164.79 |   | 13.69         |
| qPH10    | 10_13688363<br>9 | 10 | 26         | 136.88 | GxE          | 10.27 - 143.76  | * | 11.17         |
| qTBN2    | 2_141142660      | 2  | 40.88      | 141.14 | GEN          | 70.9 - 184.93   |   | 13.24         |
| qTBN7    | 7_121548061      | 7  | 24.52      | 121.55 | GEN, VB, GxE | 112.71 - 121.69 | * | 15.86 - 33.17 |
| qTKN7    | 7_15912522       | 7  | 15.35      | 15.91  | MT           | 9.14 - 121.69   |   | 17.09         |
| qTKN8    | 8_126886782      | 8  | 20.81      | 126.89 | GxE          | 82.76 - 170.04  | * | 12.86         |
| qTKN9    | 9_124180939      | 9  | 19.6       | 124.18 | VB           | 111.77 - 135.89 |   | 16.39         |
| qTL1     | 1_227715124      | 1  | 72.51      | 227.72 | GxE          | 224.77 - 244.86 | * | 19.73         |
| qTL2     | 2_230998297      | 2  | 70.19      | 231    | GEN, MT      | 0.94 - 241.68   |   | 11.56 - 11.62 |



982 **Table S1: Environmental characteristics of the experimental sites in Metepec (MT) and**  
983 **Valle de Banderas (VB) located in Mexico.**

984

| <b>Field site</b>                        | <b>Valle de Banderas (VB)<br/>Lowlands</b> | <b>Metepec (MT)<br/>Highlands</b> |
|------------------------------------------|--------------------------------------------|-----------------------------------|
| <b>Elevation (m.a.s.l.)</b>              | <b>54</b>                                  | <b>2610</b>                       |
| <b>State</b>                             | <b>Nayarit</b>                             | <b>Mexico State</b>               |
| <b>Latitude</b>                          | <b>20.784</b>                              | <b>19.223</b>                     |
| <b>Longitude</b>                         | <b>-105.244</b>                            | <b>-99.547</b>                    |
| <b>Temperature<br/>Min/Mean/Max (°C)</b> | <b>22.5/25.8/28.4</b>                      | <b>12.3/12.4/17.1</b>             |
| <b>Precipitation (mm)</b>                | <b>1173</b>                                | <b>809</b>                        |
| <b>Type of soil</b>                      | <b>Regosol</b>                             | <b>Andosol</b>                    |

985

986

987

988

989

990

991

992

993

994

995

996

997

998

999

1000

1001

1002

1003

1004

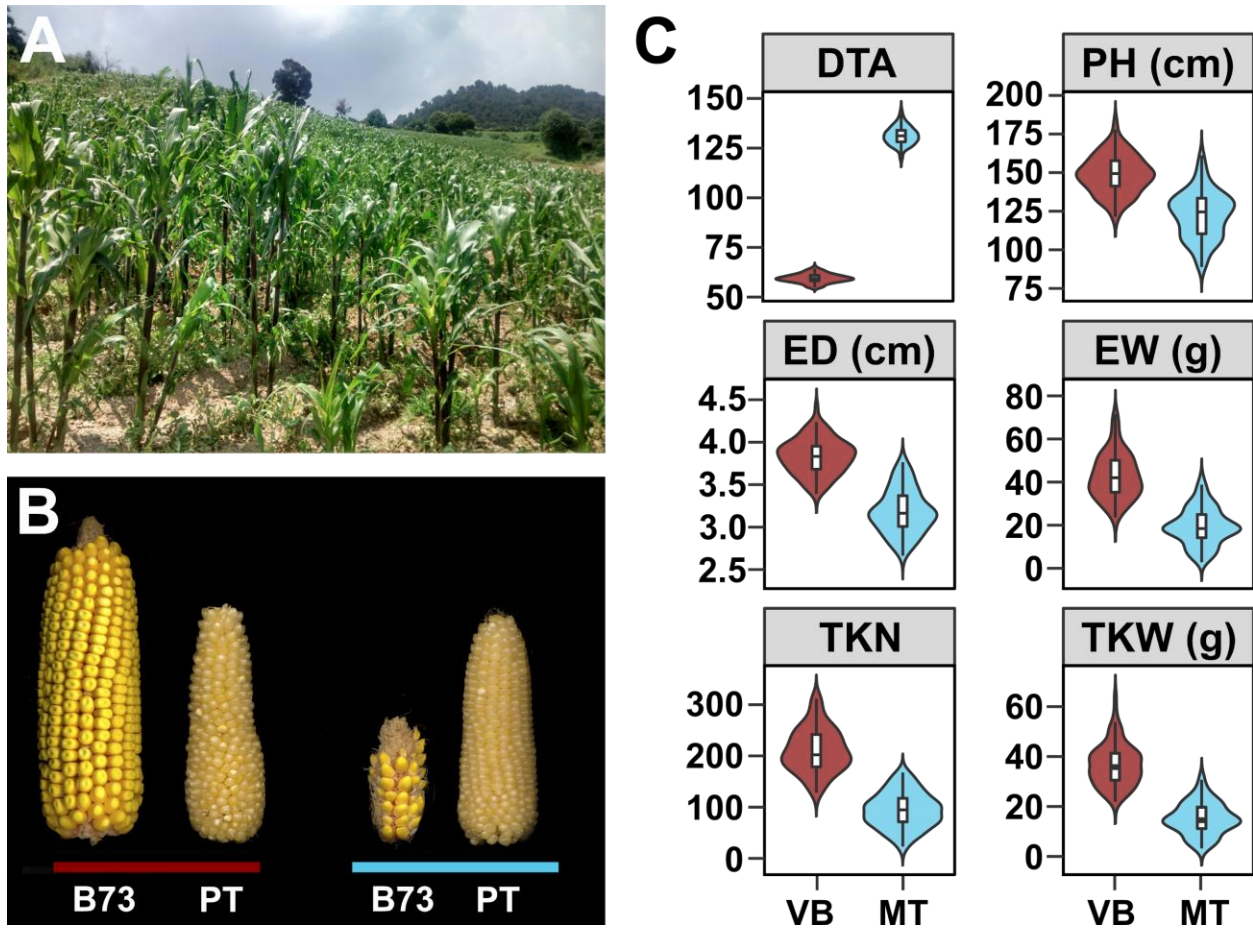

1005  
1006  
1007  
1008  
1009  
1010  
1011  
1012  
1013  
1014  
1015  
1016  
1017  
1018  
1019  
1020

**Figure 1. The highland environment impacts maize growth and productivity.** A) A representative highland cultivated maize field at 3000 m.a.s.l. near the Nevado de Toluca volcano, State of Mexico, Mexico (19.121702, -99.660812). B) Representative ears of the US adapted inbred line B73 and the Mexican highland landrace Palomero Toluqueño (PT) grown at sea level (red bar; 54 m.a.s.l.; Valle de Banderas [VB], Nayarit, Mexico) or in the highlands (blue bar; 2610 m.a.s.l.; Metepec [MT], State of Mexico, Mexico). C) Effect of the highland environment on plant performance. Distribution of trait values for 122 B73xPT BC<sub>1</sub>S<sub>5</sub> lines grown in the lowland (VB; red) and highland (MT; blue) field sites. Trait codes: DTA - days to anthesis (days); PH - plant height (cm); ED - ear diameter (cm); EW - ear dry weight (g); TKN - total kernel number; TKW - total kernel weight (g). Fitted values for each genotype and location combination were used to generate violin plots and were estimated by adding BLUPs of the G+GEI to the estimated location mean. Boxes represent the interquartile range with the horizontal line representing the median and whiskers representing 1.5 times the interquartile ranges. The shape of the violin plot represents probability density of data at different values along the y-axis.

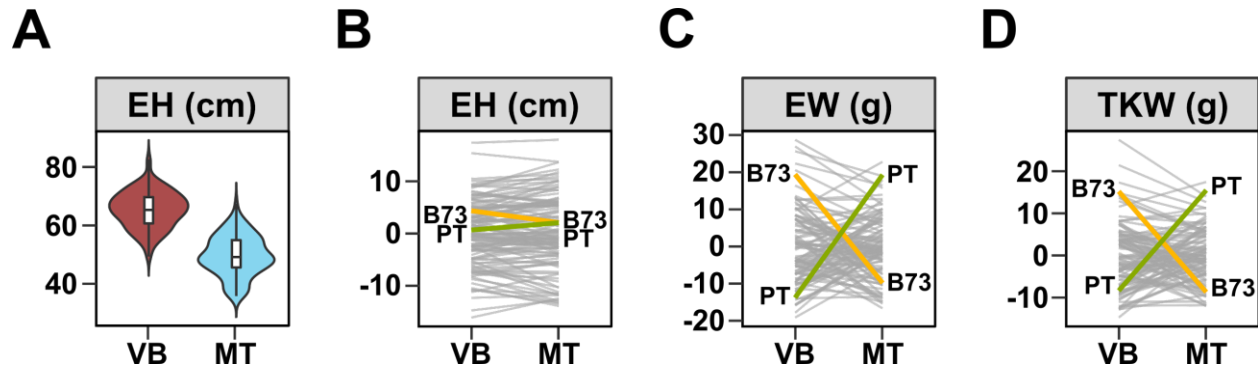

1021  
1022  
1023  
1024  
1025  
1026  
1027  
1028  
1029  
1030

**Figure 2. Extensive GEI was observed for yield components.** A) Distribution of *ear height* (EH, cm) in low (VB) and high elevation (MT) field sites. Boxes represent the interquartile range with the horizontal line representing the median and whiskers representing 1.5 times the interquartile range. The shape of the violin plot represents probability density of data at different values along the y-axis. B) Reaction norm plot for EH, showing little GEI. Values shown are G + GEI deviations from the field site average. Line segments connect values for each RIL genotype in the two field sites. B73 (yellow) and PT (green) parental values are shown. C), D) as B, showing extensive rank-changing GEI associated with *ear weight* (EW, g) and *total kernel weight* (TKW, g), respectively.

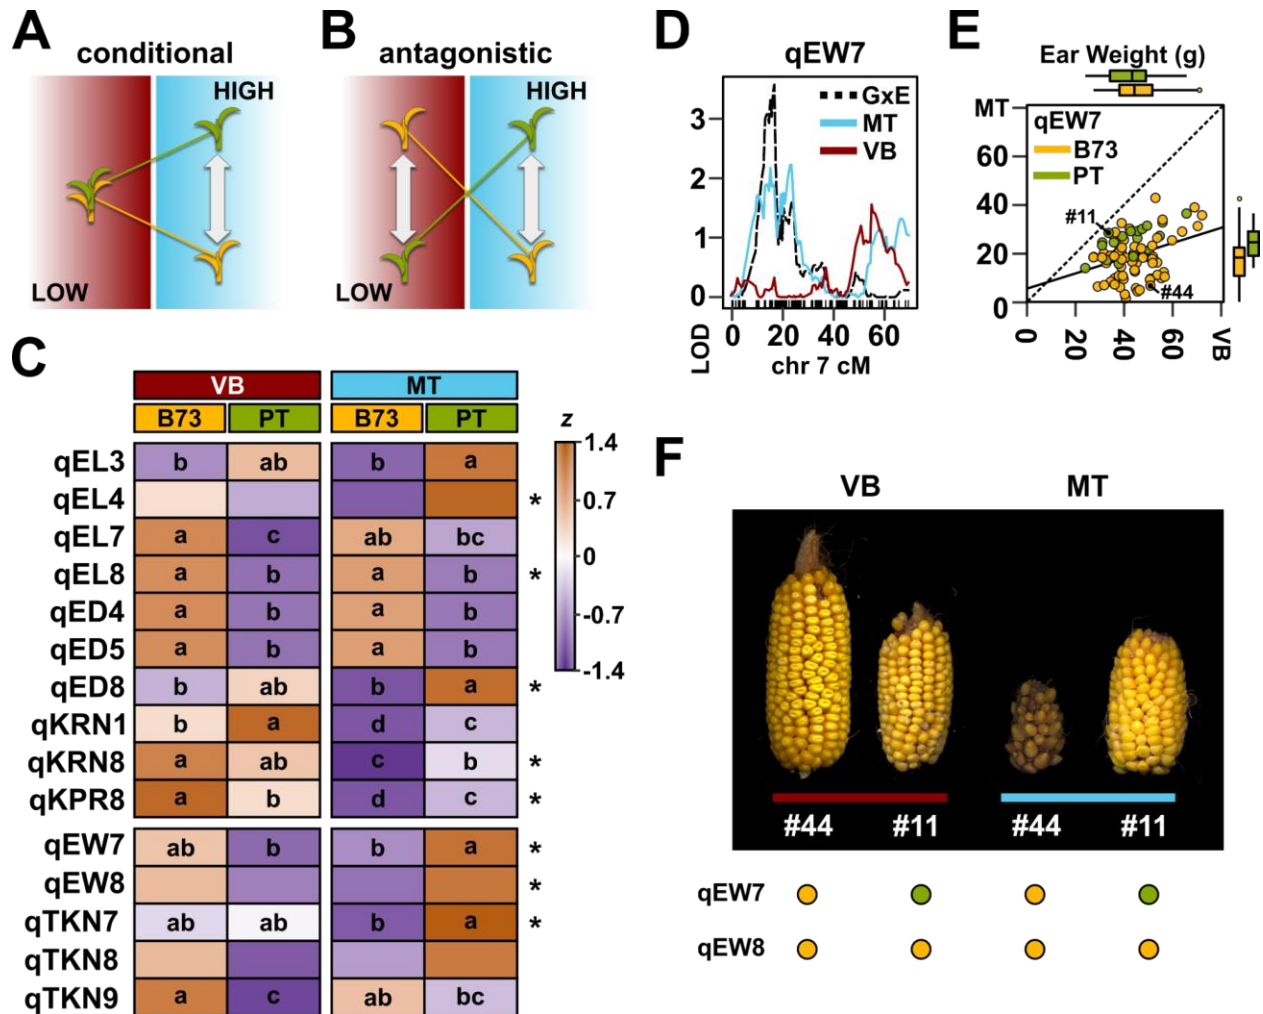

1031  
1032  
1033  
1034  
1035  
1036  
1037  
1038  
1039  
1040  
1041  
1042  
1043  
1044  
1045  
1046  
1047

**Figure 3. QEI interactions contribute to local adaptation.** A,B) Schematic of QEI under models of A) *conditional* effect in one environment but not another or B) *antagonistic pleiotropy* showing a change in the sign of the QTL effect between environments. C) Heatmap representation of the standardized median G + GEI value for all families with a given genotype (B73 or PT) in lowland (VB) and highland (MT) sites, for the named QTL (see Table 2). Asterisks indicate QTL identified in the GEI model. Lowercase letters indicate Tukey means groups. D) LOD support for a conditional *ear weight* (EW) QTL (qEW7) on the short arm of chromosome (chr) 7. The QTL is well supported by data from the highland site (MT, blue trace) but not the lowland site (VB, red trace), and is captured by a multiQTL model for GxE (black trace). E) Scatter plot of EW in highland (MT) against lowland (VB) fields. Each RIL is represented by a single point, colored by genotype at qEW7 (yellow, B73; green, PT). RILs shown in F below are labelled. The solid line shows a linear fit through all points. Box plots parallel to the vertical and horizontal axes show the distribution by genotype in MT and VB, respectively. Boxes represent the interquartile range with the horizontal line representing the median, and whiskers extending 1.5 times the interquartile range. F) Ears of RILs LANMLR17B044 (#44) and LANMLR17B011 (#11) produced in lowland (red bar) and highland (blue bar) fields, showing marked differences in stability with respect to field. Points below the panel indicate QTL genotype.



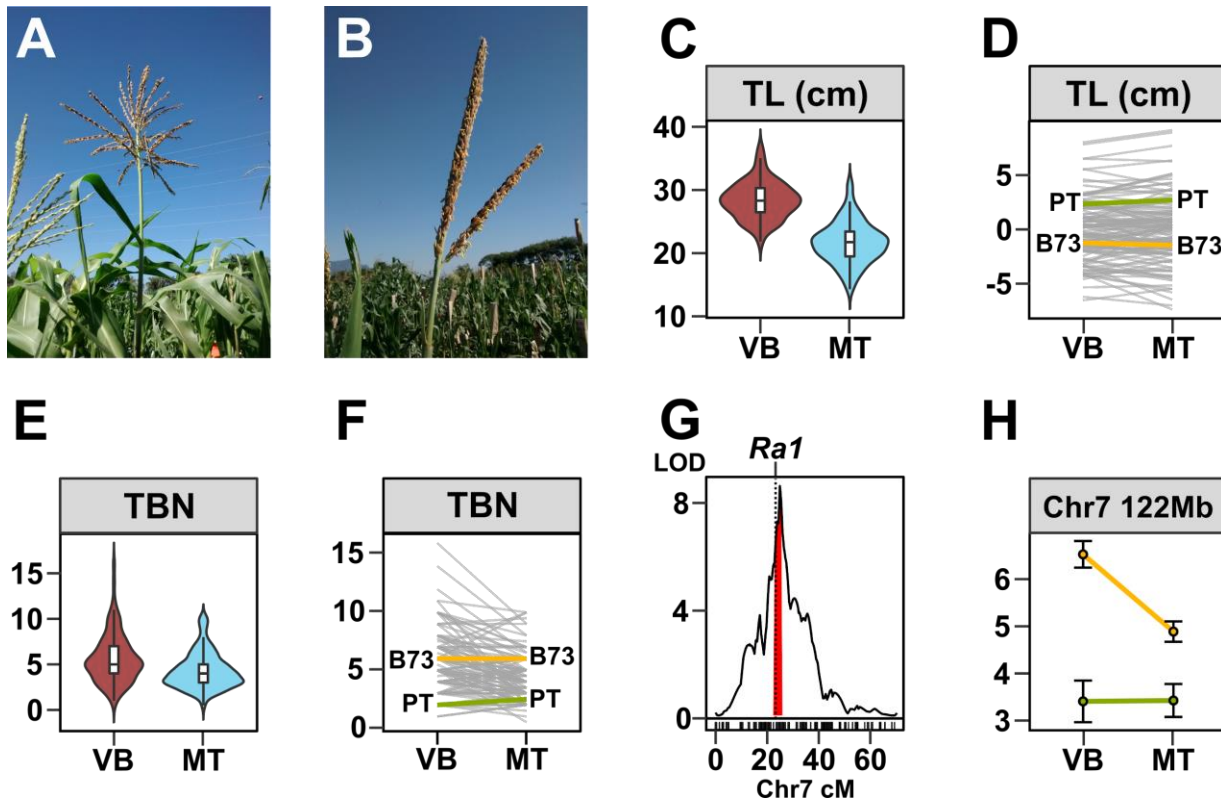

1048  
1049  
1050  
1051  
1052  
1053  
1054  
1055  
1056  
1057  
1058  
1059  
1060  
1061  
1062

**Figure 4. A major QTL for tassel branch number co-localizes with the *Ramosal1* gene.** In comparison with typical maize varieties (A), tassel branching is strongly reduced in Mexican highland maize (B). C) Distribution of tassel length (TL, cm) in low (VB) and high (MT) field sites. Boxes represent the interquartile range with the horizontal line representing the median and whiskers representing 1.5 times the interquartile range. The shape of the violin plot represents probability density of data at different values along the y-axis. D) Reaction norm plot for TL. Values shown are G + GxE deviations from the field site average. Line segments connect values for each RIL genotype in the two field sites. B73 (yellow) and PT (green) parental values are shown. E, F) as C and D for tassel branch number (TBN). For F, the plot shows the median for each genotype in each field. G) LOD support (multQTL model, G main effect) for a qTBN7 that co-localizes with the *Ramosal1* (*Ra1*) candidate gene. Red shading indicates a drop 2 LOD interval around the peak marker. H) Effect of the chr 7 TBN QTL showing trait values for families carrying B73 (yellow) or PT (green) alleles in lowland (VB) or highland (MT) field sites.

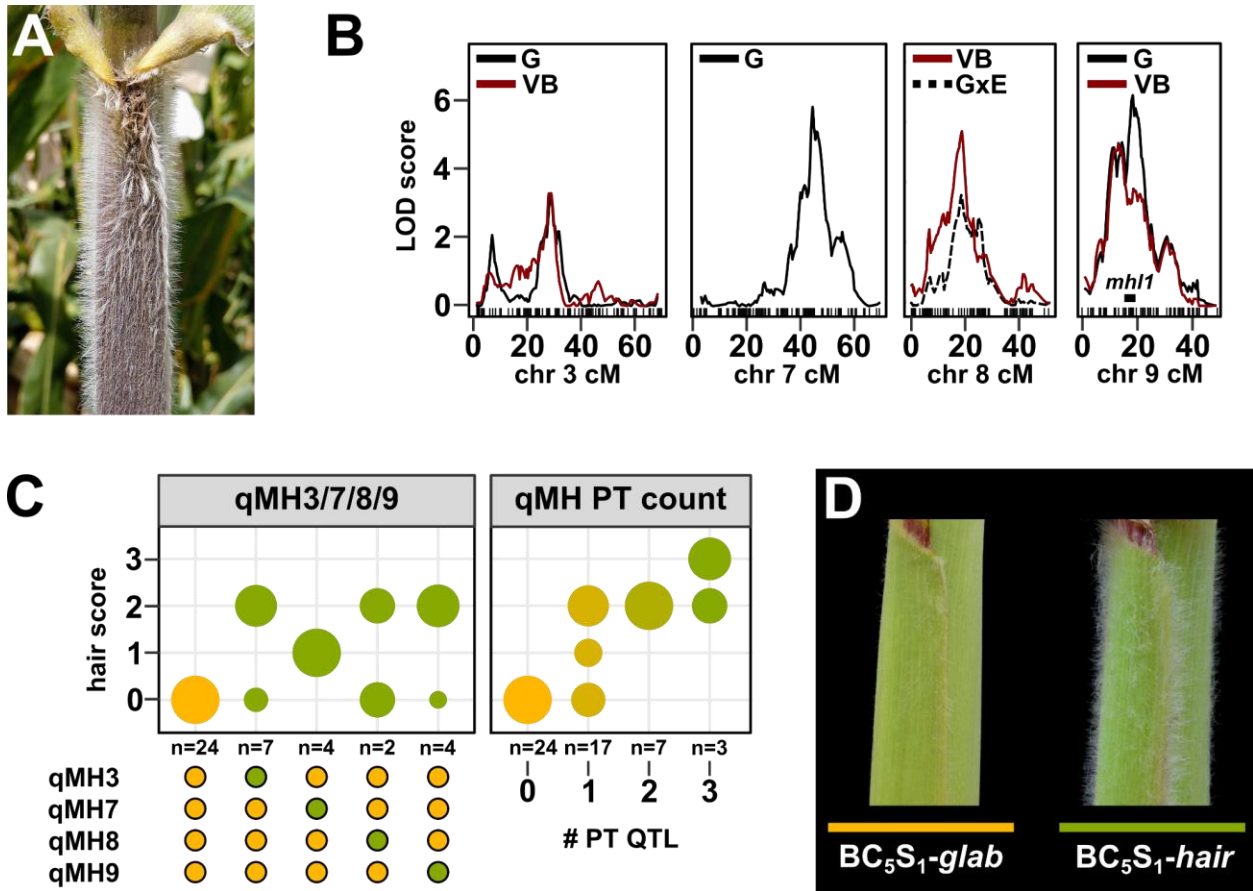

1063  
1064  
1065  
1066  
1067  
1068  
1069  
1070  
1071  
1072  
1073  
1074  
1075  
1076

**Figure 5. Stem macrohair production is promoted by multiple QTL.** A) Mexican highland maize is characterized by extensive sheath pubescence. B) QTLs linked to macrohair score (MH) on chromosomes (chr) 3, 7, 8 and 9. Trace shows LOD support for the macrohair trait in the lowland field (VB), in the genotype main effect (G) or for GEI (GxE). Teosinte introgression on chr 9 reported by Hufford *et al.*, 2013 that includes the *mhl1* locus is marked by a black bar. C) QTL effect shown as the proportion (shown by circle diameter in the main plot) of RILs scored for different hair score values in a given genotypic class (B73 allele, yellow; PT allele, green). Panels show the effect of allele substitution at the stated QTL in the subset of RILs for which the other QTLs are fixed as B73 and the cumulative effect of increasing the number of PT alleles at qMH 3, 7, 8 or 9. Points below the panel indicate QTL genotype. D) Glabrous (*glab*) and pubescent (*hair*) near-isogenic siblings generated by selection for pubescent plants through five generations of backcrossing of a Mexican Conico highland landrace to B73.

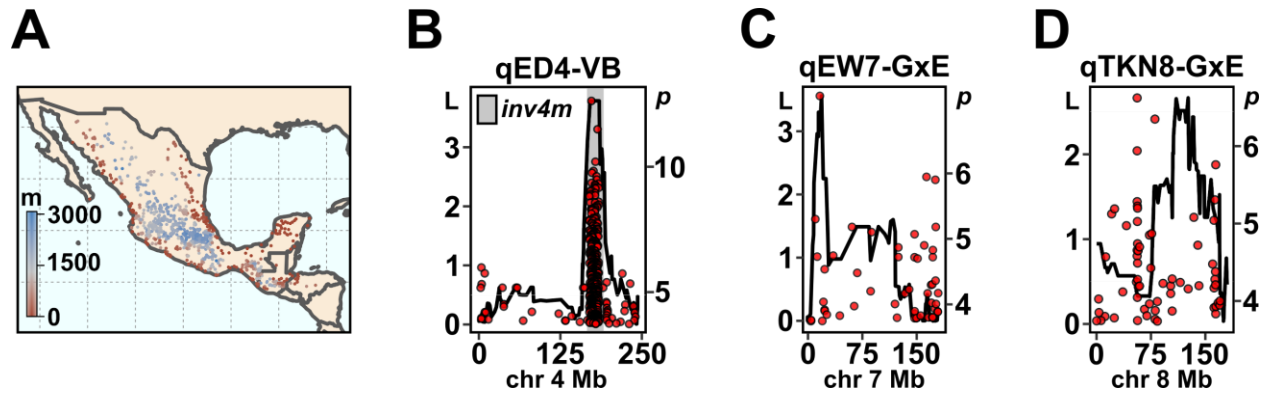

1077  
1078  
1079  
1080  
1081  
1082  
1083  
1084  
1085  
1086  
1087  
1088

**Figure 6. Colocalization of QTL with SNPs showing elevational variation in Mexican landrace maize.** A) Geographic distribution of Mexican maize landraces. The color gradient represents elevation of the associated sampling location of maize landrace accessions. B) Trace showing support (LOD, L) for an *ear diameter* (ED) QTL across chromosome 4 (chr 4; physical distance) and SNPs (red points) significantly ( $-\log_{10}p$ ,  $p$ ) associated with elevation in Mexican maize landraces. LOD profile drawn using physically anchored genetic markers and trait values from the lowland site (VB). The gray rectangle indicates the position of the previously characterized *inv4m* inversion polymorphism. C, D) as B, showing support for *ear weight* (EW) and *total kernel number* (TKN) QTL on chromosomes 7 and 8, respectively. LOD profiles associated with trait GEI (GxE) values.

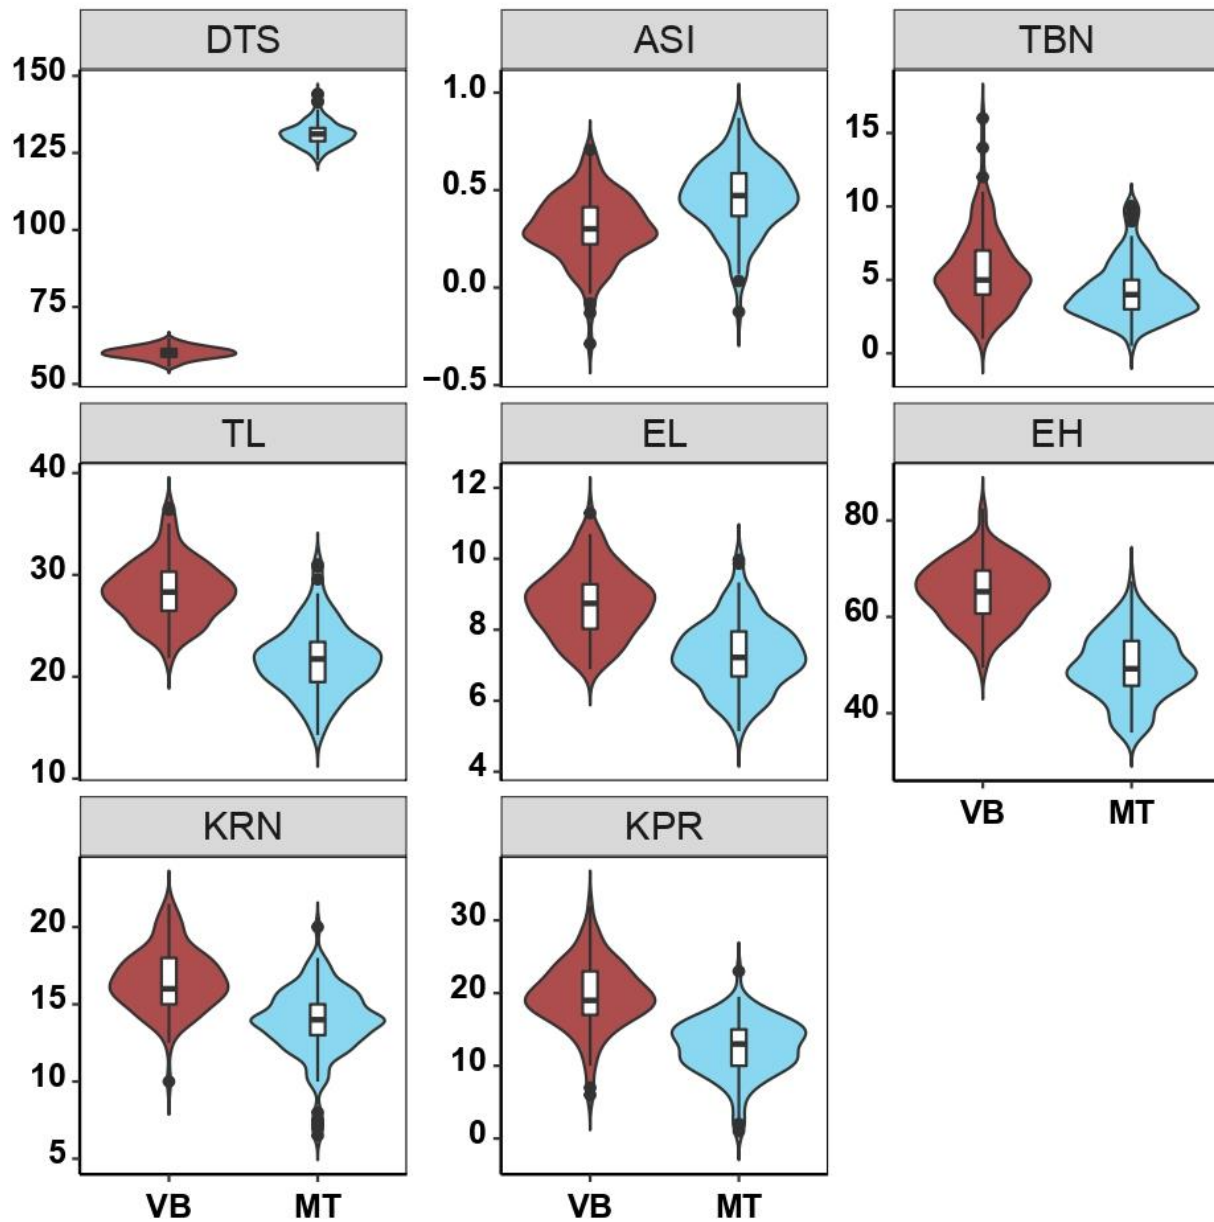

1089  
1090  
1091  
1092  
1093  
1094  
1095  
1096  
1097  
1098

**Figure S1 - Supplemental 1** Distribution of plant phenotypic traits for B73xPT recombinant inbred lines grown in VB or MT field sites (trait descriptions were shown in Table 1). Fitted values for each genotype and location combination were used to generate violin plots and were estimated by adding BLUPs of the G+GEI to the estimated location mean. Median values were used to generate the violin plots for TBN, KPR, KRN. Boxes represent the interquartile range with the horizontal line representing the median and whiskers representing 1.5 times the interquartile ranges. The shape of the violin plot represents probability density of data at different values along the y-axis.

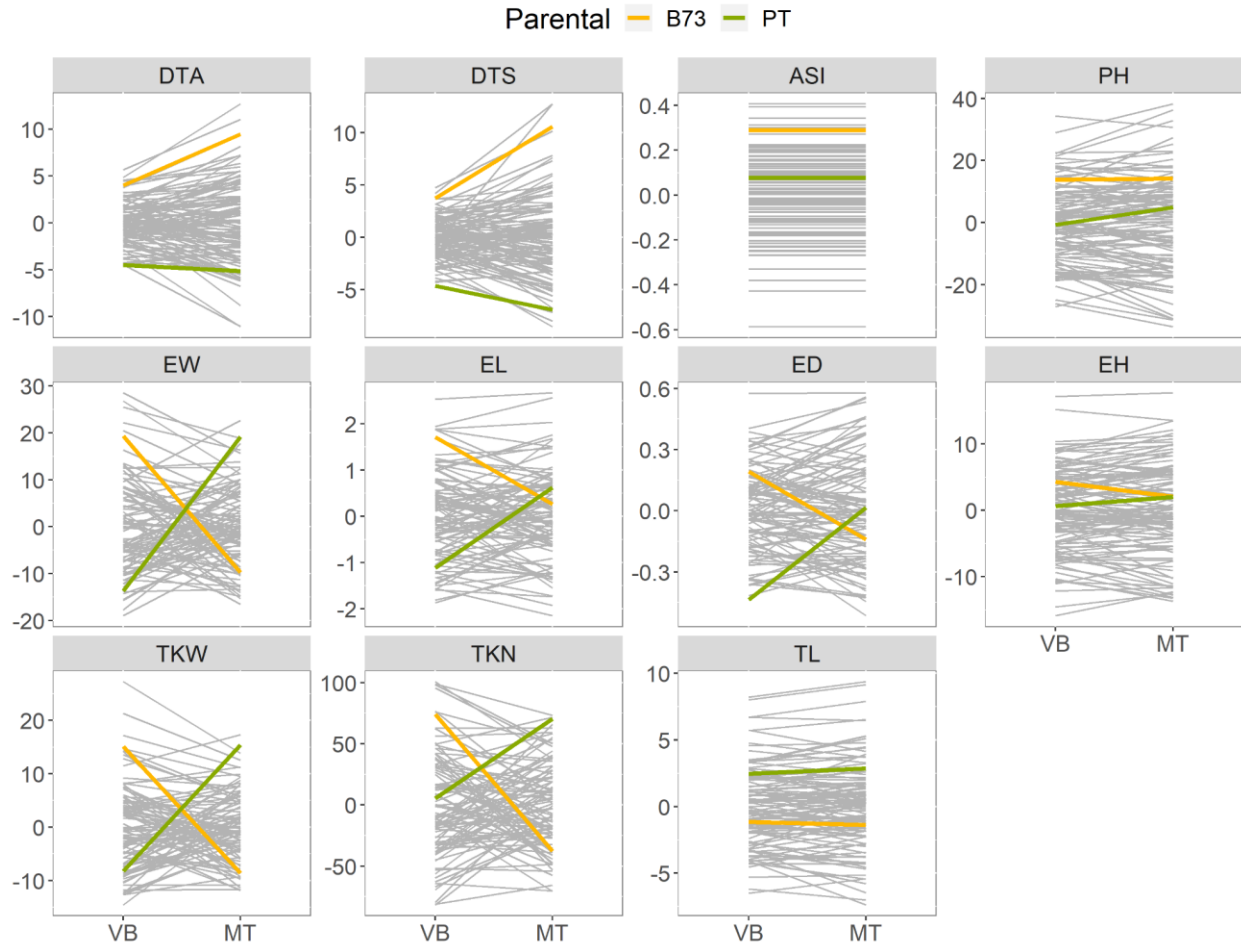

1099  
1100  
1101  
1102  
1103  
1104  
1105

**Figure S2 - Supplemental 1** Reaction norm plots of plant phenotypic traits for B73xPT recombinant inbred lines grown in VB or MT field sites (trait descriptions were shown in Table 1). Values shown are the sum of Best Linear Unbiased Prediction (BLUP) for genotype and genotype by location interaction effects for each genotype in two field sites. Gray line segments connect values for each RIL genotype in the two field sites. B73 and PT parental values are shown in thick yellow and green lines respectively.

1106  
1107

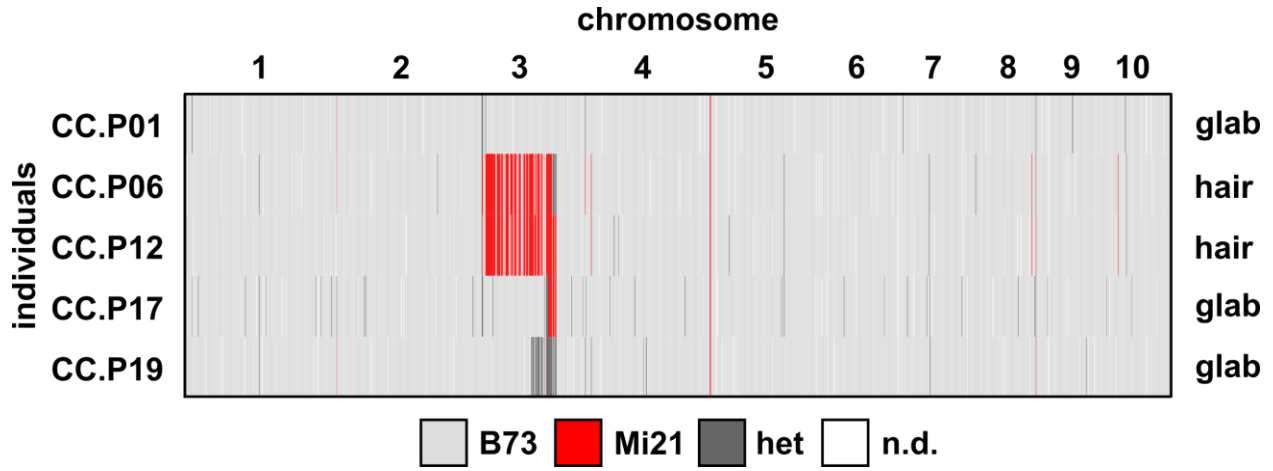

1108  
1109  
1110  
1111  
1112  
1113  
1114

**Figure S3. Pubescent segregants from a B73xMi21 BC<sub>5</sub>S<sub>1</sub> family contain Mi21 introgression on chromosome 3.** Three glabrous (glab) and two pubescent (hair) individuals genotyped with DaRT-SEQ.

1115

1116

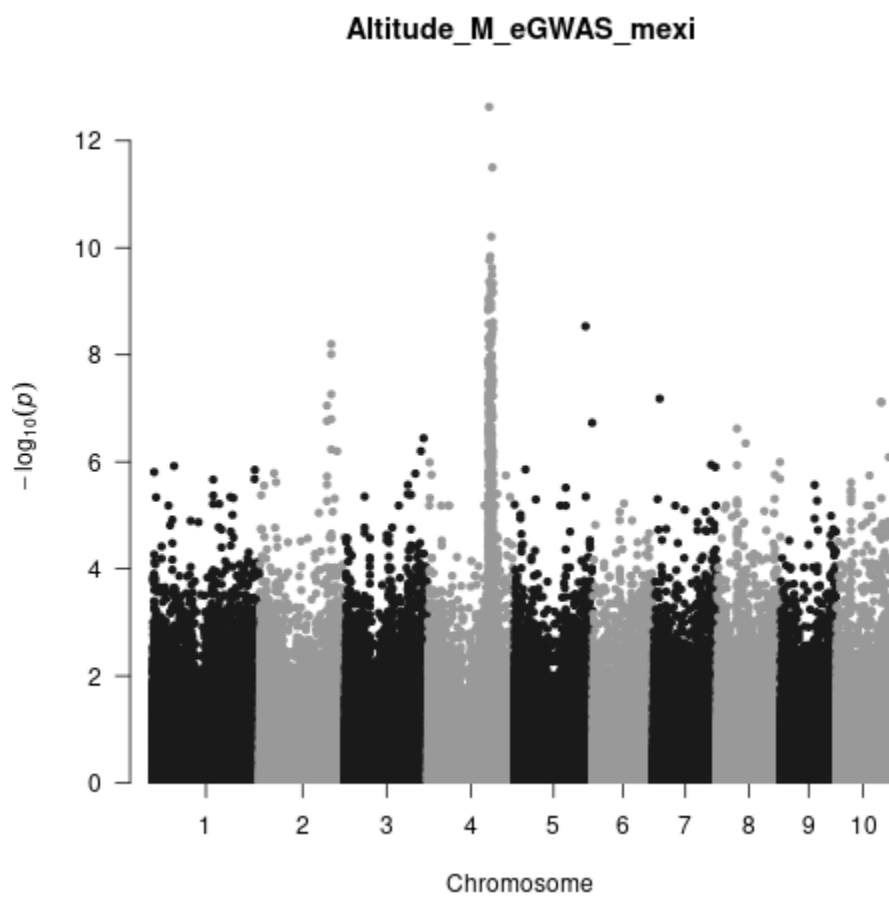

1117

1118 **Figure S4. Elevation eGWAS Manhattan plot**

1119



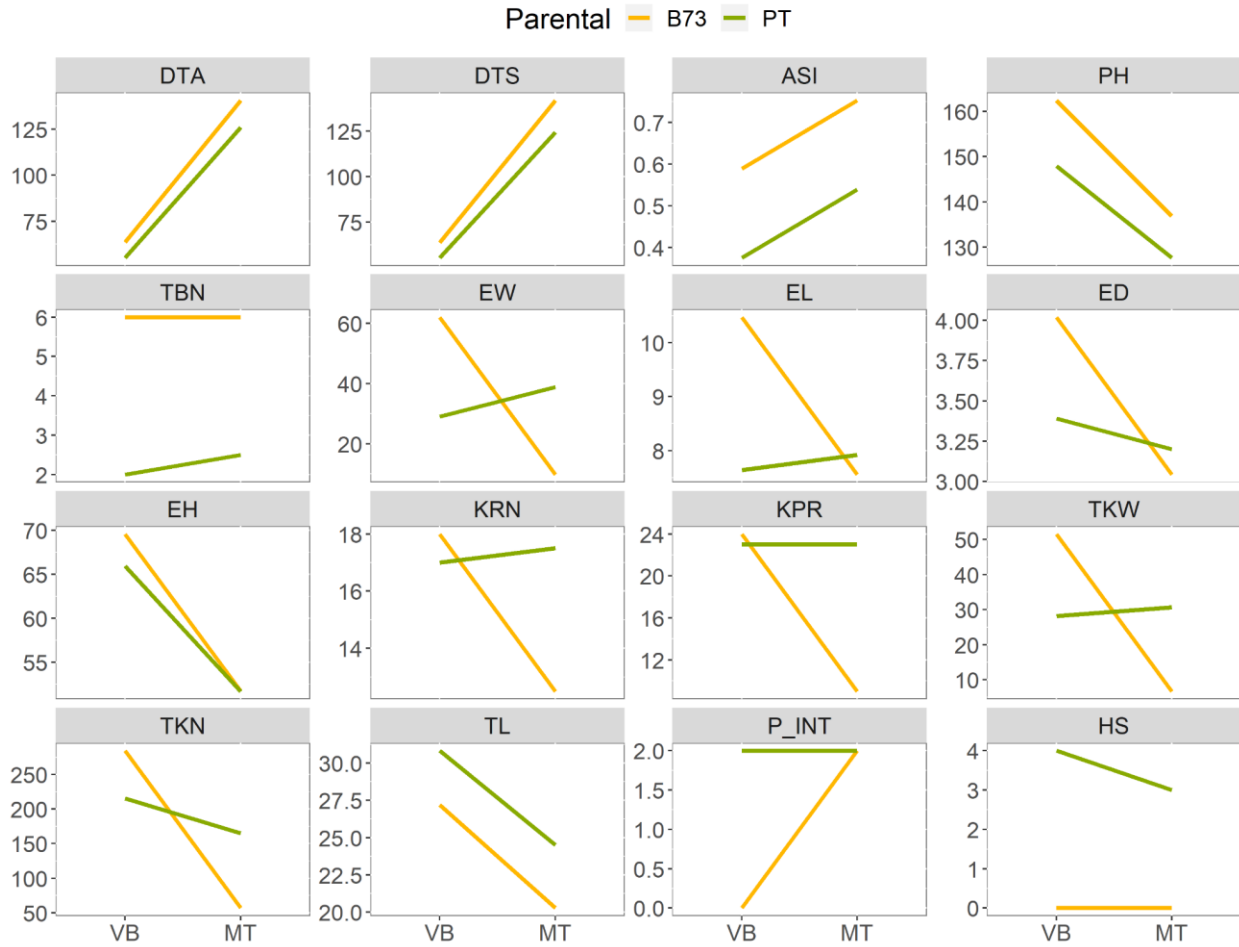

1120

1121 **Figure S5 - Supplemental 1:** Reaction norms of B73 (green line) and Palomero Toluqueño landrace (yellow line)  
 1122 grown in VB and MT field sites (trait descriptions were shown in Table 1). The fitted values were estimated by  
 1123 adding BLUPs of the G+GEI to the estimated location mean. Palomero Toluqueño values were obtained by  
 1124 evaluating multiple heterozygous individuals from MEXI5 accession from CIMMYT.

1125

1126

1127

1128

1129

1130

1131

1132

1133

1134

1135

1136

1137

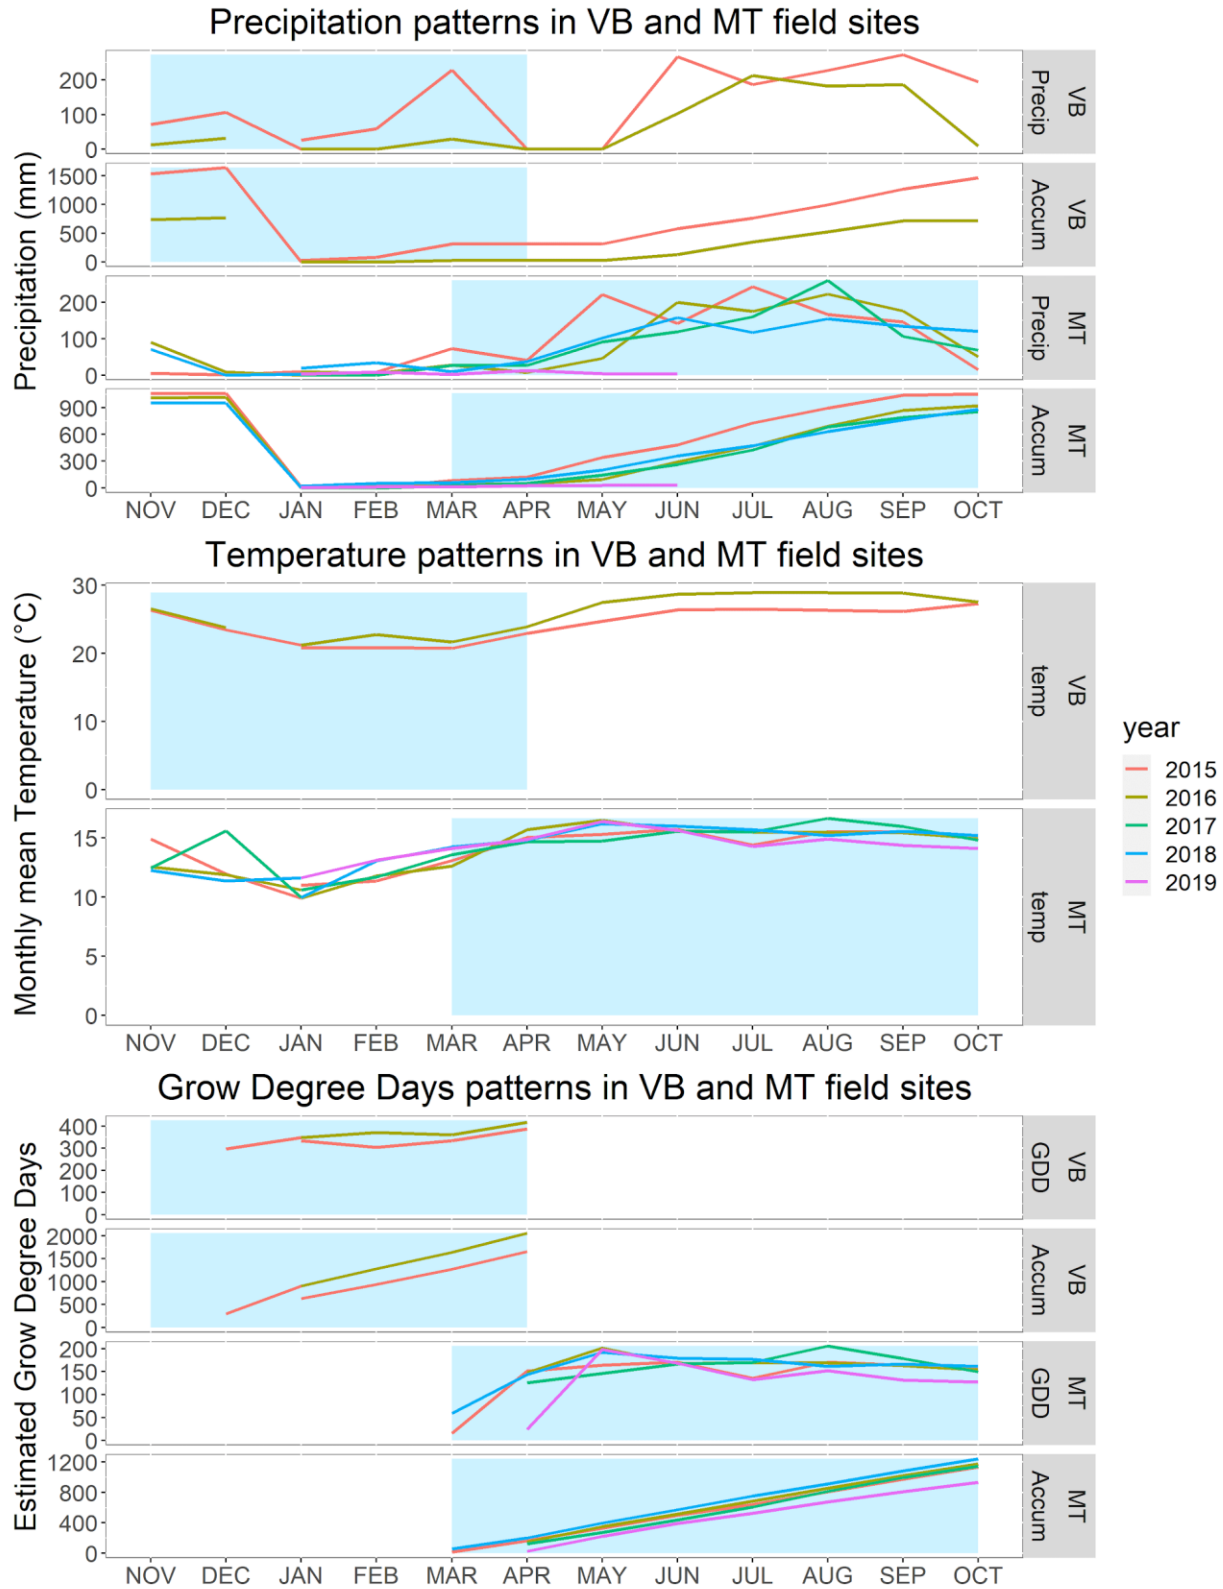

1138  
1139  
1140  
1141

**Figure 8 - Supplemental 1:** Monthly and accumulated precipitation, monthly average temperature and monthly and accumulated estimated Grow Degree Day patterns for VB and MT field sites for the years where evaluation was performed (2014-2015, 2015-2016 for VB field)

1142 site; 2015, 2016, 2018 and 2019 for MT field site). The precipitation (in mm) and monthly mean  
1143 temperature (°C) data was obtained from CONAGUA (National Commission on Water) database  
1144 ([https://smn.conagua.gob.mx/es/climatologia/informacion-climatologica/informacion-estadistica-](https://smn.conagua.gob.mx/es/climatologia/informacion-climatologica/informacion-estadistica-climatologica)  
1145 [climatologica](https://smn.conagua.gob.mx/es/climatologia/informacion-climatologica/informacion-estadistica-climatologica); estation #15266 for MT site; estation #18030 for VB site) and temperature data  
1146 was complemented with <https://wu-next-ibm.wunderground.com/> where needed. Grow Degree  
1147 Days estimation was performed with the formula  $GDD = (T_{mean} - 10) * n$  where  $T_{mean}$  is the  
1148 monthly average temperature and  $n$  is the number of days accumulated in that month. The blue  
1149 areas describe the typical growing season in winter in VB site (november-april) and summer in  
1150 MT site (march-october).

1151  
1152  
1153  
1154  
1155  
1156  
1157  
1158  
1159  
1160  
1161  
1162  
1163  
1164  
1165  
1166  
1167  
1168  
1169  
1170  
1171  
1172  
1173  
1174  
1175  
1176  
1177  
1178  
1179  
1180  
1181  
1182  
1183  
1184  
1185  
1186
